# Supplementary material for: Synergic morphology engineering and pore functionality within a metal–organic framework for trace CO2capture
Source: Royal Society of Chemistry journal article supplement (doi:10.1039/d1ta09974d), 2021-12-01
Supplement: d1ta09974d1.pdf [file d1ta09974d1.pdf]

## Supporting Information

### **Synergic morphology engineering and pore functionality within a metal-organic framework for trace CO<sub>2</sub> capture**

Peng Hu <sup>a</sup>, Hao Liu <sup>a</sup>, Hao Wang <sup>a</sup>, Jie Zhou <sup>a</sup>, Yongqing Wang <sup>a,\*</sup> and Hongbing Ji <sup>a,b,\*</sup>

<sup>a</sup> Fine Chemical Industry Research Institute, School of Chemistry, Sun Yat-Sen University, Guangzhou, 510275, P.R., China.

<sup>b</sup> School of Chemical Engineering, Guangdong University of Petrochemical Technology, Maoming, 525000, P.R. China.

---

\* Corresponding author: Hongbing Ji ([jihb@mail.sysu.edu.cn](mailto:jihb@mail.sysu.edu.cn)), Yongqing Wang ([wangyq223@mail.sysu.edu.cn](mailto:wangyq223@mail.sysu.edu.cn))

## Table of Contents

|                                                                  |    |
|------------------------------------------------------------------|----|
| 1. Computational details.....                                    | 3  |
| 1.1. Periodic Density Functional Theory (PDFT) calculation ..... | 3  |
| 1.2. Grand Canonical Monte Carlo (GCMC) calculation .....        | 3  |
| 1.3. Molecular dynamics (MD) simulations .....                   | 4  |
| 2. Calculation of the separation potential.....                  | 4  |
| 2.1. Dual Langmuir-Freundlich parameter fits .....               | 4  |
| 2.2. Calculations of ideal adsorbed solution theory .....        | 4  |
| 2.3. Calculations of isosteric heat .....                        | 5  |
| 3. Supporting Figures .....                                      | 7  |
| 4. Supporting Tables .....                                       | 45 |

## 1. Computational details

All the calculations including the geometry optimization and adsorption conformation, etc. were all performed in the Material Studio 7.0 package.

### 1.1. Periodic Density Functional Theory (PDFT) calculation

The initial structures of all the materials and guest molecules are first optimized in the Dmol<sup>3</sup> module, adopting the generalized gradient approximation (GGA) with the Perdew-Burke-Ernzerhof (PBE) functional. The energy, force and displacement convergence criteria were set as  $1 \times 10^{-5}$  Ha,  $2 \times 10^{-3}$  Ha and  $5 \times 10^{-3}$  Å, respectively. To obtain the gas binding energy, an isolated gas molecule placed in a cell unit (with the same cell dimensions as the MOF crystal). The static binding energy (at  $T = 0$  K) could be expressed:  $E_B = E(\text{MOF}) + E(\text{gas}) - E(\text{MOF} + \text{gas})$ <sup>1</sup>.

### 1.2. Grand Canonical Monte Carlo (GCMC) calculation

The preferential binding conformation between guests and MOF structure were initially searched through GCMC simulations. Note that host framework and the gas molecule were both rigid in GCMC simulations through using Metropolis method, so that the produced the host-guest binding energies were equal to adsorption enthalpies. For all the GCMC simulations, the frameworks and the gas molecules were described by the universal forcefield (UFF), and QEq charges were employed to the atoms of the framework and guest molecules, respectively. The loading steps, equilibration steps and the production steps were all set to  $1.0 \times 10^6$  and the temperature was set at 298 K. The cut-off radius was chosen as 15.5 Å for the Lennard-Jones (LJ) potential and the long-

range electrostatic interactions were handled by the Ewald & Group summation method.

### 1.3. Molecular dynamics (MD) simulations

The classical molecular dynamics (MD) simulations were performed in the Forcite module. The initial configurations for the MD simulations were produced by the GCMC simulation. The framework and the gas molecule were both deemed as rigid character and the cutoff radius was chosen as 15.5 Å for the LJ potential. The constant-volume & temperature (NVT) ensemble was used to simulate the dynamic processes. The electrostatic interactions and the van der Waals interactions were evaluated by the Ewald summation method, with a Buffer width of 0.5 Å.

## 2. Calculation of the separation potential

### 2.1. Dual Langmuir-Freundlich parameter fits

Dual-Langmuir-Freundlich isotherm model was adopted to fit the single-component loadings for CO<sub>2</sub>, N<sub>2</sub> and CH<sub>4</sub> at 298 K, as shown in Equation 1 and 2:

$$q = N_1 \frac{ap^b}{1 + ap^b} + N_2 \frac{cp^d}{1 + cp^d} \quad (1)$$

With  $T$ -dependent parameters  $a$  and  $c$ ,

$$a = a_0 \exp\left(\frac{E_A}{RT}\right); c = c_0 \exp\left(\frac{E_B}{RT}\right) \quad (2)$$

The fitting parameters were listed in Table S7.

### 2.2. Calculations of ideal adsorbed solution theory

The gas adsorption selectivity at 298 K and 1 bar was calculated using ideal adsorbed solution theory (IAST) on the basis of the single-component adsorption data. The

adsorption selectivity for CO<sub>2</sub>/CH<sub>4</sub> and CO<sub>2</sub>/N<sub>2</sub> separation is defined by Equation 3:

$$S_{ads} = \frac{q_1 / q_2}{p_1 / p_2} \quad (3)$$

In above equation, the fitting parameters  $q_1$  and  $q_2$  reflected the molar adsorption in the adsorbed phase in equilibrium with the bulk gas phase with partial  $p_1$  and  $p_2$ . In this work, dual-site Langmuir-Freundlich (DSLFF) model was applied to fit CO<sub>2</sub>, N<sub>2</sub> and CH<sub>4</sub> isotherms on the samples.

### 2.3. Calculations of isosteric heat

The isosteric heat ( $Q_{st}$ ), being the crucial thermodynamic variable in adsorption process, affording serviceable information about the binding affinity between the adsorbate molecules and the adsorbent surfaces at different coverage. For this sake, the coverage-dependent adsorption enthalpy was evaluated from sorption data profiles measured at 298 and 318 K by adopting virial fitting method. In detail, a Virial-type equation mainly contained parameters  $a_i$  and  $b_i$ , which were independent of temperature. In the equation,  $a_i$  and  $b_i$  represent the fitting Virial coefficients,  $m$  and  $n$  stands for the numbers of coefficients needed to precisely the isotherms, as shown in Equation 4:

$$\ln P = \ln n + \frac{1}{T} \sum_{i=0}^l a_i n^i + \sum_{j=0}^m b_j n^j \quad (4)$$

The value of isosteric heat ( $Q_{st}$ ) could be achieved by virtue of following Clausius-Clapeyron equation, as defined in Equation 5:

$$Q_{st} = -R \left[ \frac{\partial \ln p}{\partial (1/T)} \right]_n = -R \sum_{i=0}^l a_i \quad (5)$$

### Notation

- $b_A$  Langmuir-Freundlich constant for species  $i$  at adsorption site A,  $P_a^{-\nu_{iA}}$
- $b_B$  Langmuir-Freundlich constant for species  $i$  at adsorption site B,  $P_a^{-\nu_{iB}}$
- $E$  Energy parameter, J mol<sup>-1</sup>
- $Q_{st}$  Isostatic heat of adsorption, J mol<sup>-1</sup>
- $c_i$  molar concentration of species  $i$  in gas mixture, mol m<sup>-3</sup>
- $c_{i0}$  molar concentration of species  $i$  in gas mixture at inlet to adsorber, mol m<sup>-3</sup>
- $t$  Time, s
- $T$  Absolute temperature, K

### Greek letters

- $\nu$  Freundlich exponent, dimensionless

### 3. Supporting Figures

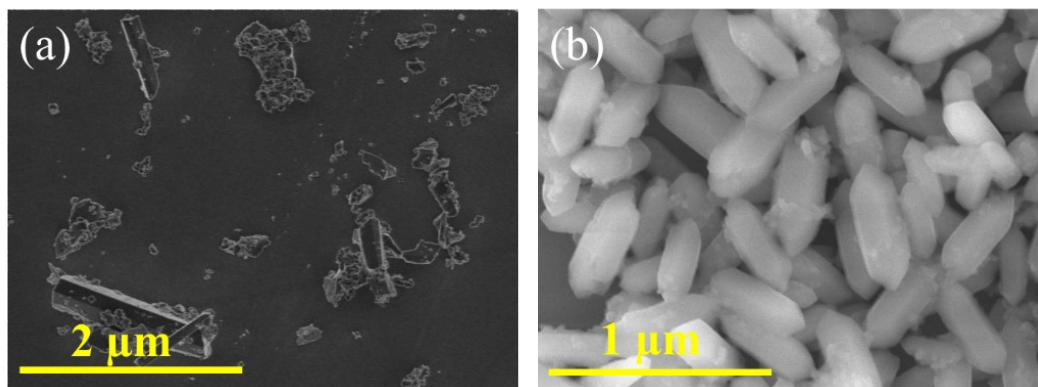

**Figure S1.** SEM images of (a) Co-MOF prepared by traditional solvothermal method and (b) pyz-functionalized **1a'** through facile heating procedure.

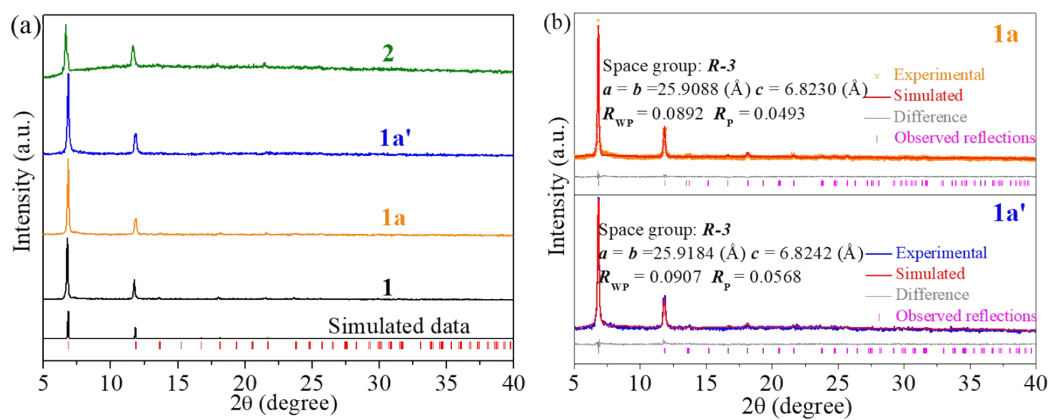

**Figure S2.** Powder X-ray diffraction (PXRD) of (a) as-prepared materials and (b) corresponding Rietveld structural refinements of **1a** and **1a'** using GSAS package.



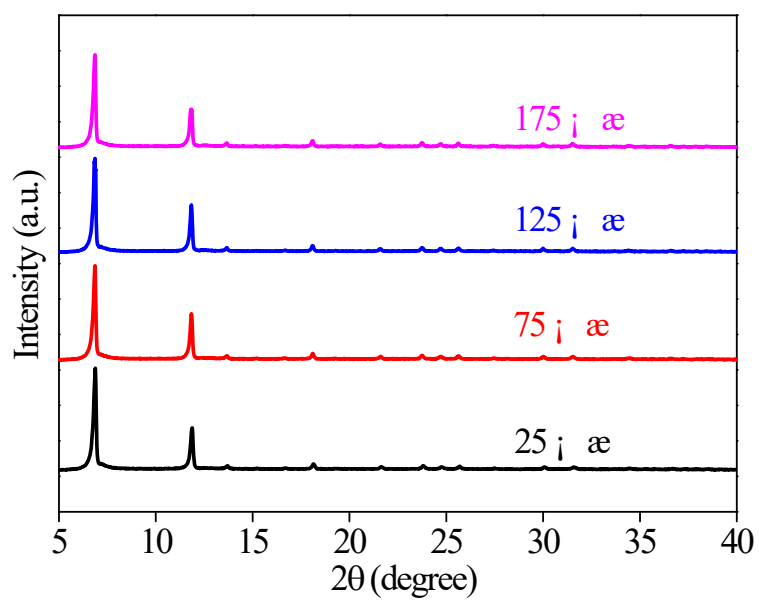

**Figure S3.** Experimental powder PXRD patterns for **1a'** recorded at variable temperatures.

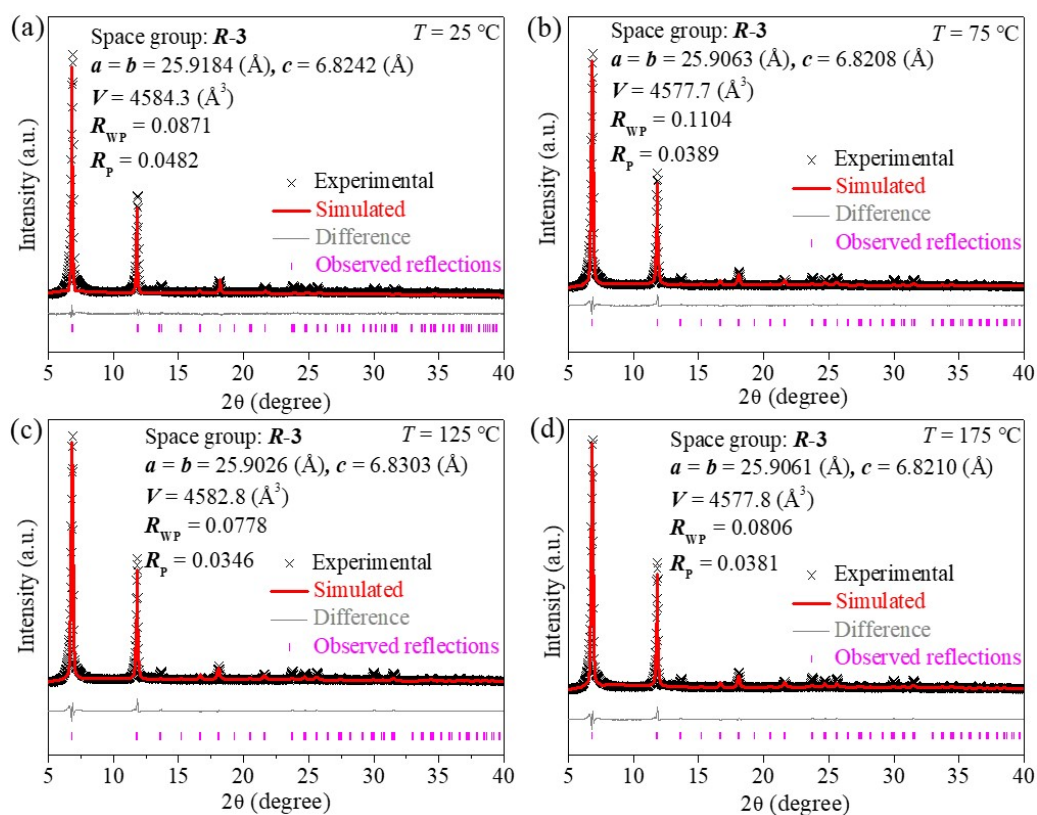

**Figure S4.** Rietveld structural refinements of **1a'** recorded at variable temperatures.

Unit-cell parameters were obtained by using GSAS package.

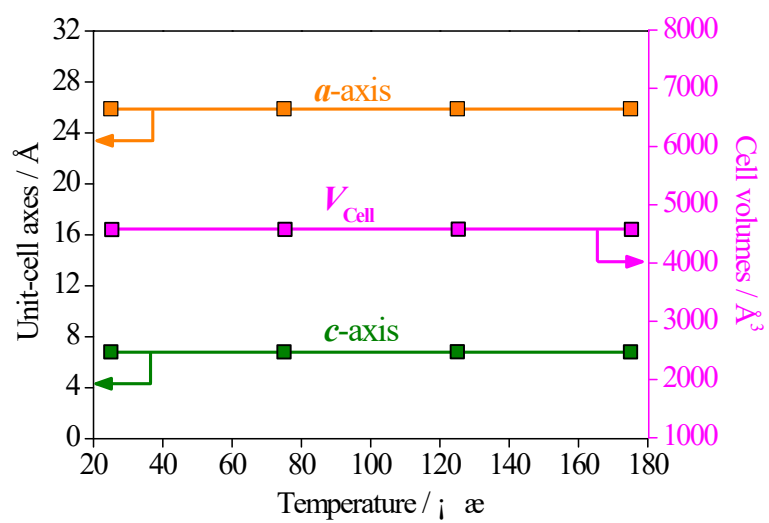

**Figure S5.** Variable-temperature unit-cell parameters for **1a'**.

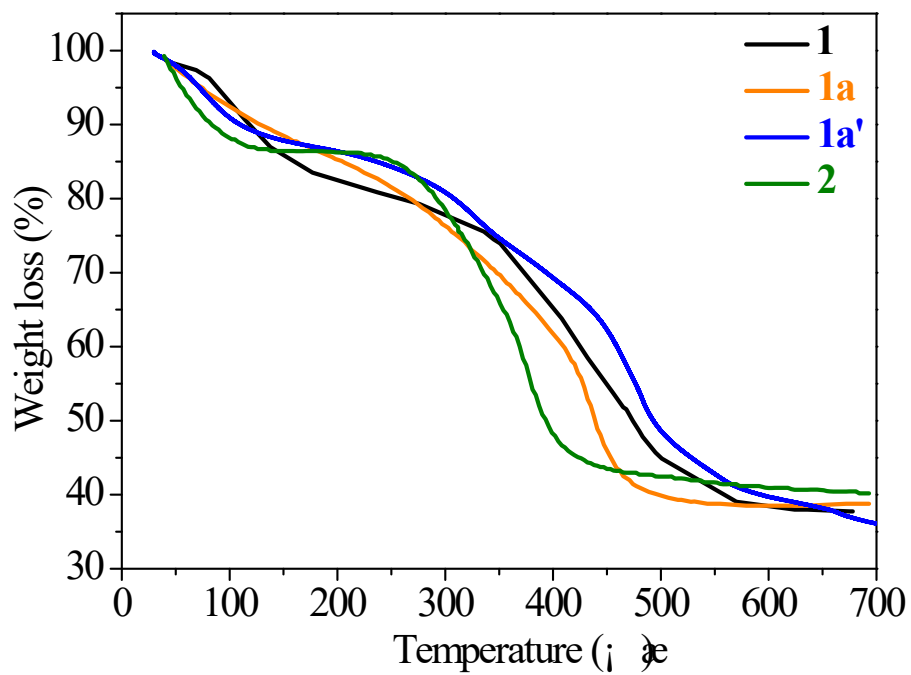

**Figure S6.** TGA plots for all the materials under N<sub>2</sub> flux with a heating rate of 5 °C per minute.

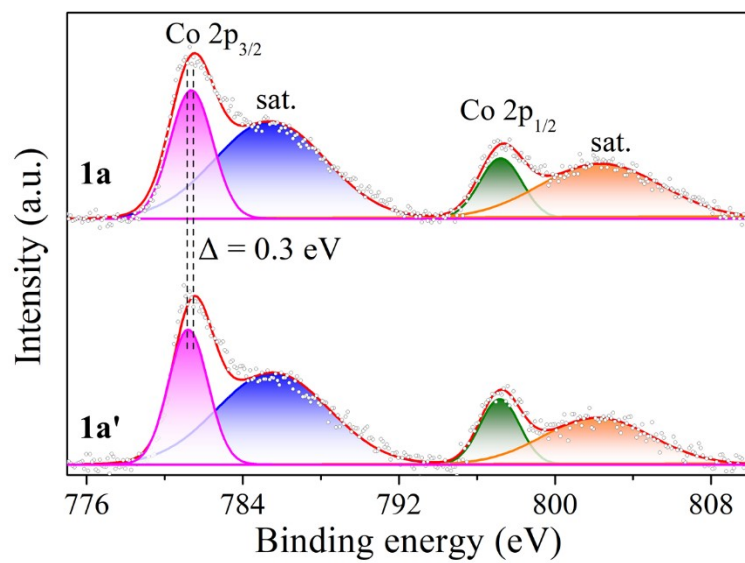

**Figure S7.** High resolution of Co 2p XPS in **1a** and **1a'**.

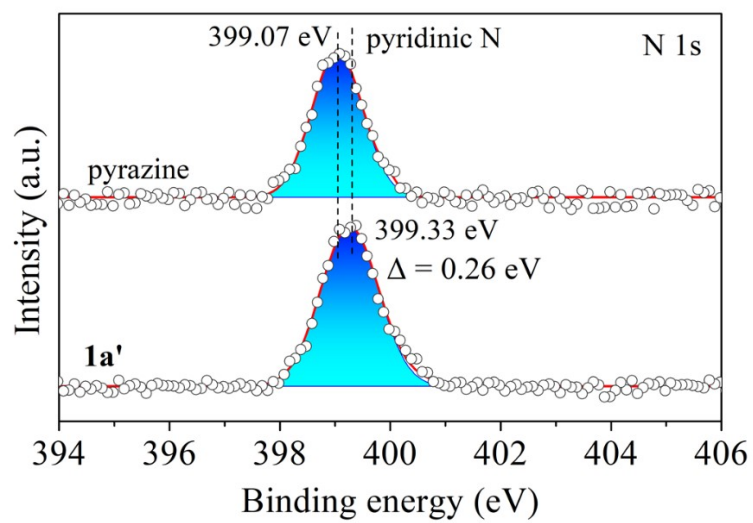

**Figure S8.** High resolution of N 1s XPS in pyrazine and **1a'**.

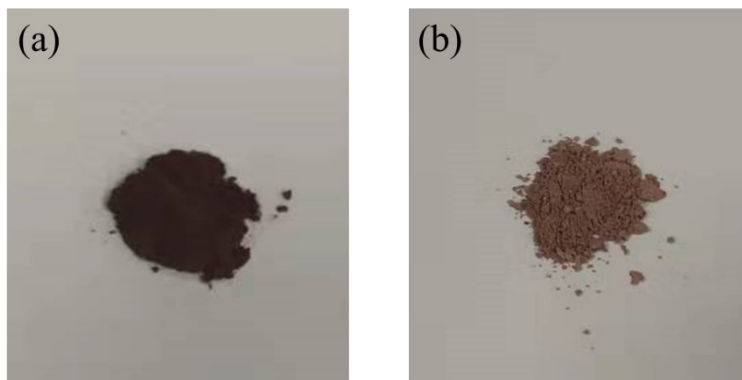

**Figure S9.** Photograph images of (a) **1a** and (b) **1a'** powder.

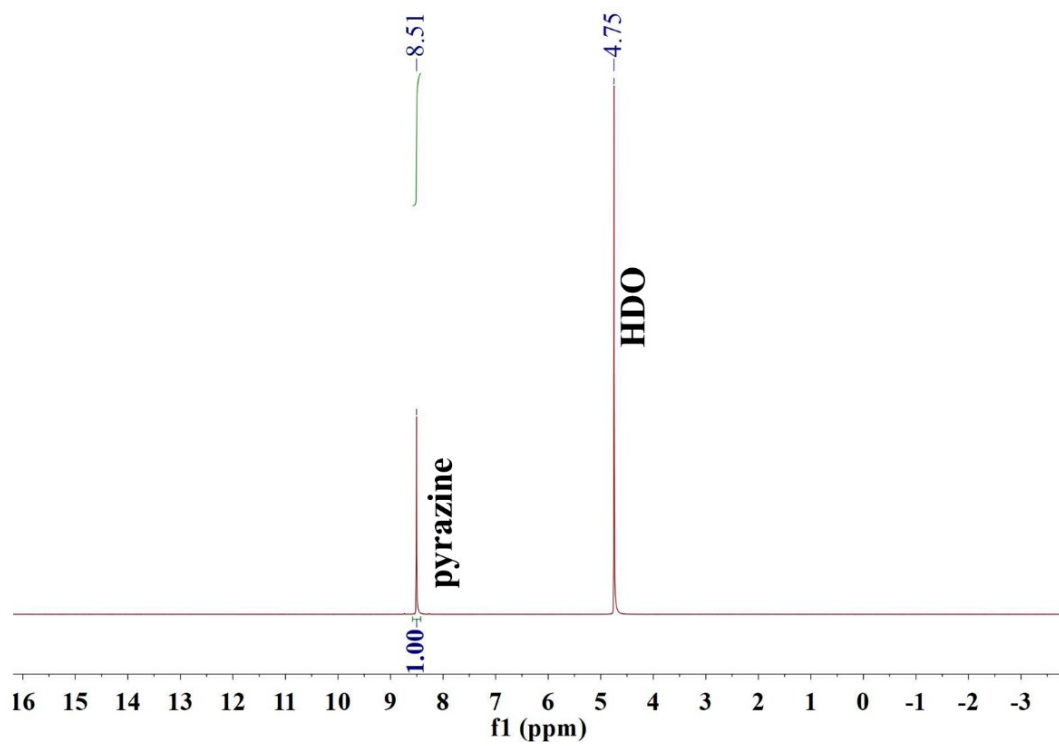

**Figure S10.**  $^1\text{H}$  NMR spectrum of digested pyrazine (pyz) in 1 M NaOH/D<sub>2</sub>O for 24 h.



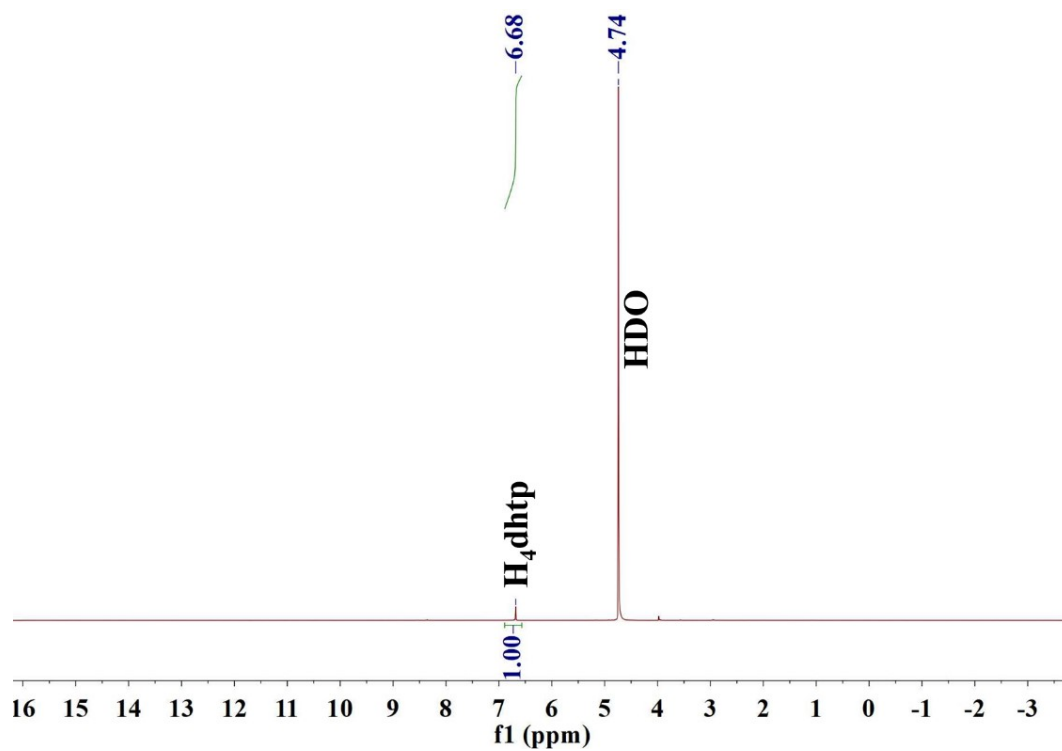

**Figure S11.**  $^1\text{H}$  NMR spectrum of digested  $\text{H}_4\text{dhtp}$  in 1 M NaOH/ $\text{D}_2\text{O}$  for 24 h.

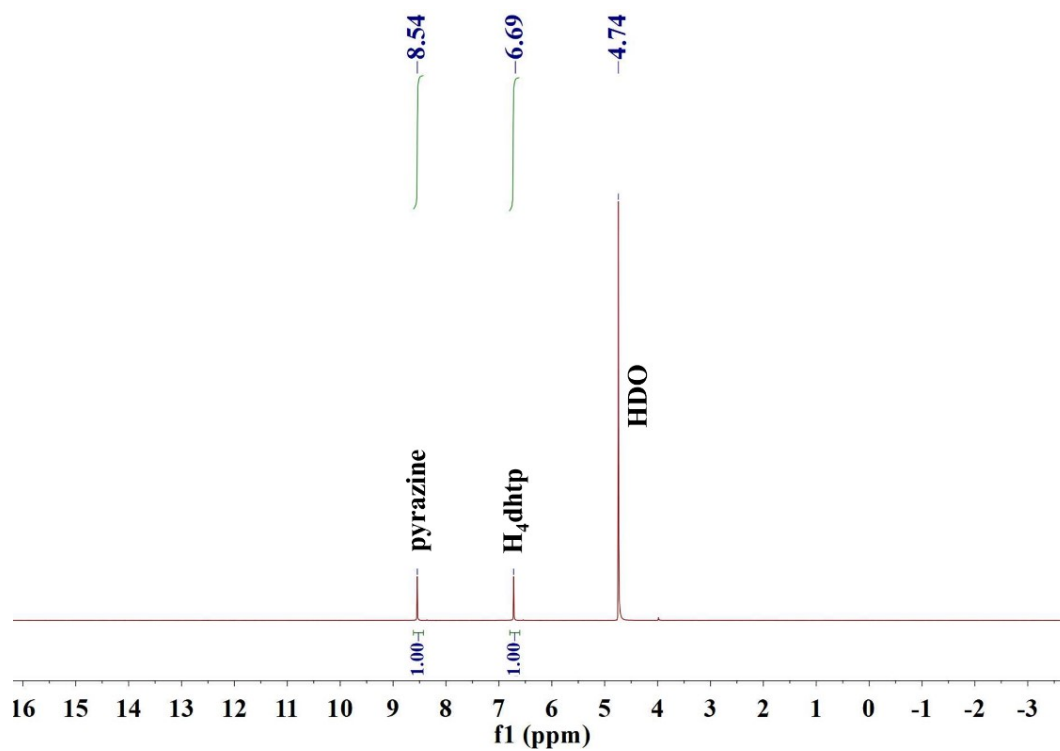

**Figure S12.** <sup>1</sup>H NMR spectrum of digested **1a'** in 1 M NaOH/D<sub>2</sub>O for 24 h.

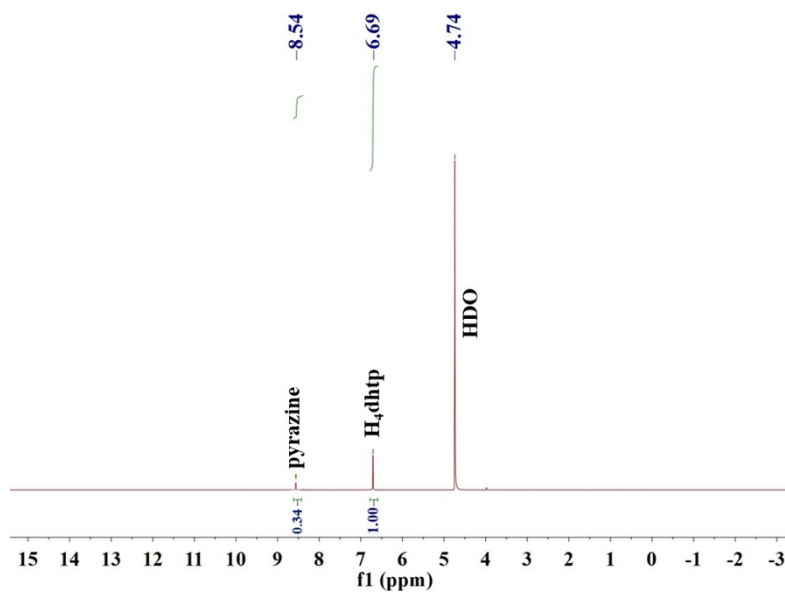

**Figure S13.** <sup>1</sup>H NMR spectrum of digested **2** in 1 M NaOH/D<sub>2</sub>O for 24 h.

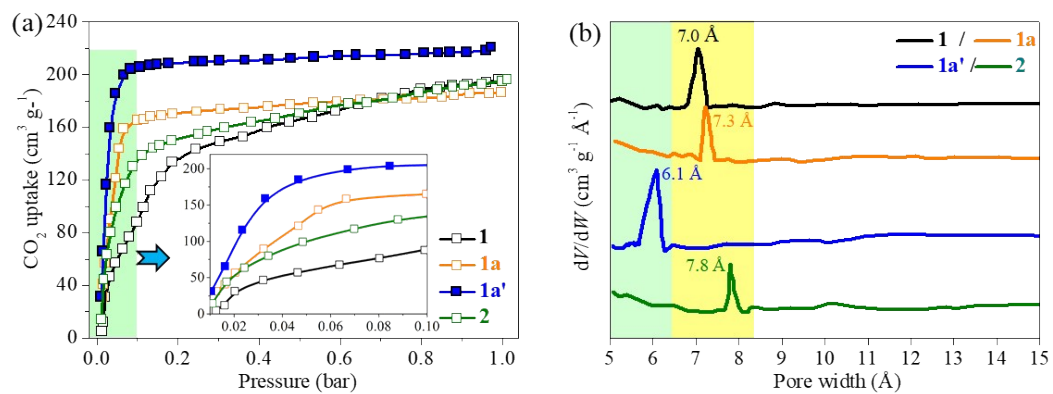

**Figure S14.** (a) Adsorption isotherms of CO<sub>2</sub> on the selected materials at 195 K and 1 bar, (b) Pore size distribution of materials using Horvath-Kawazoe model.

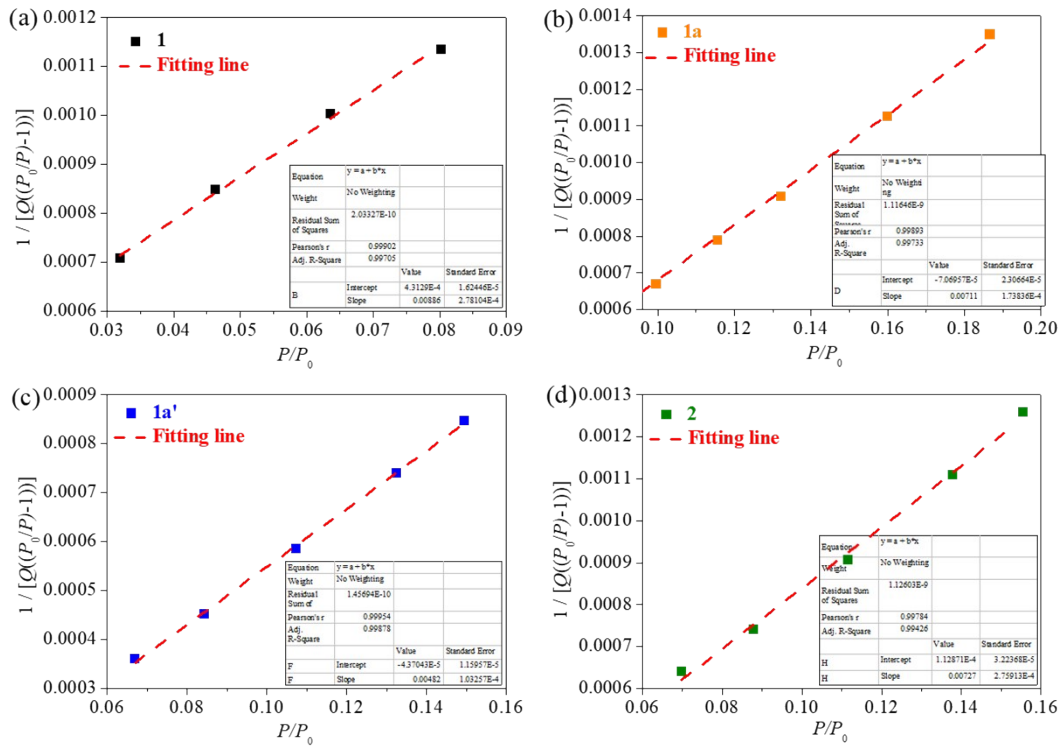

**Figure S15.** Plot of the linear region on the CO<sub>2</sub> isotherm at 195 K of materials for the BET equation.

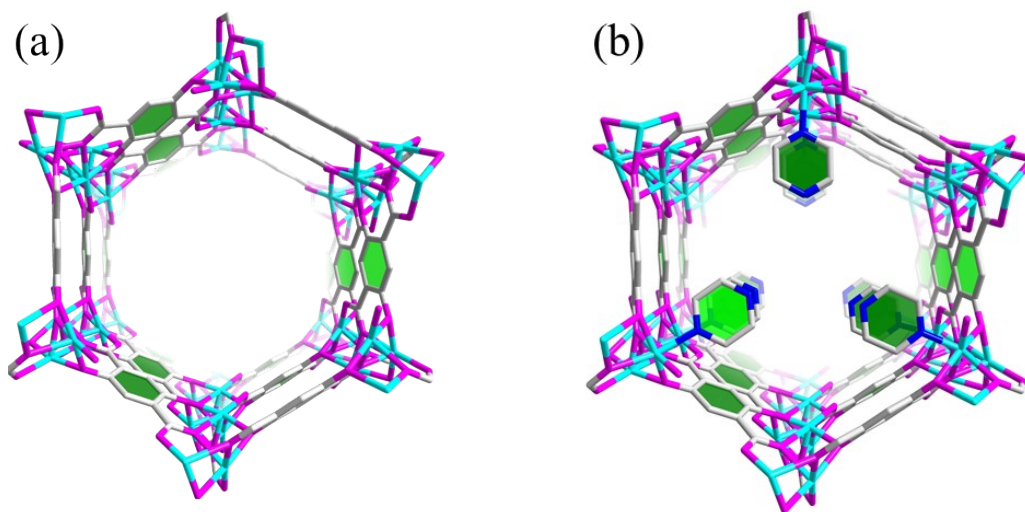

**Figure S16.** DFT-D optimized pore geometry in (a) **1a** and (b) **1a'**.

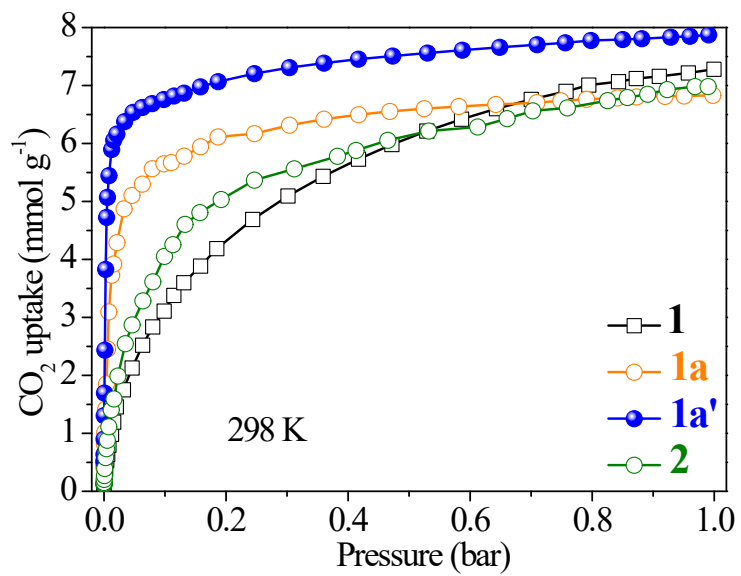

**Figure S17.** CO<sub>2</sub> adsorption isotherms of as-prepared samples measured at 298 K and 1 bar with a linear abscissa.

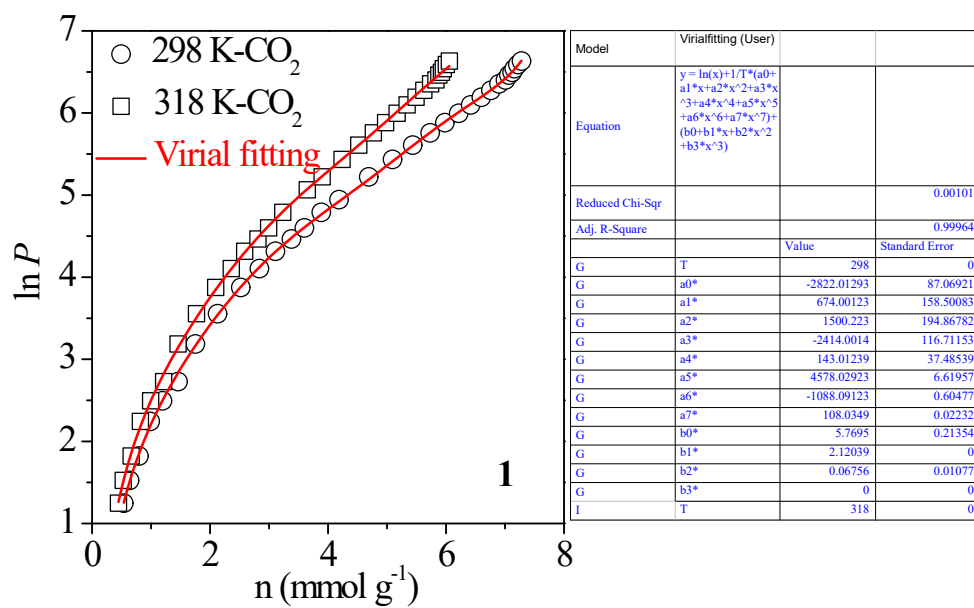

**Figure S18.** Virial fitting (lines) of the CO<sub>2</sub> adsorption isotherms over **1** measured at 298 and 318 K.



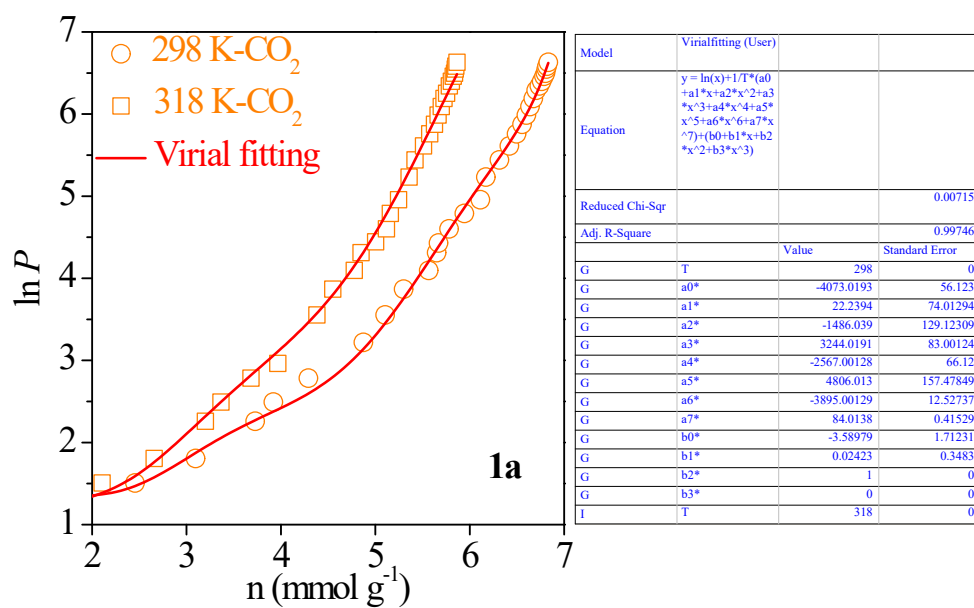

**Figure 19.** Virial fitting (lines) of the CO<sub>2</sub> adsorption isotherms over **1a** measured at 298 and 318 K.

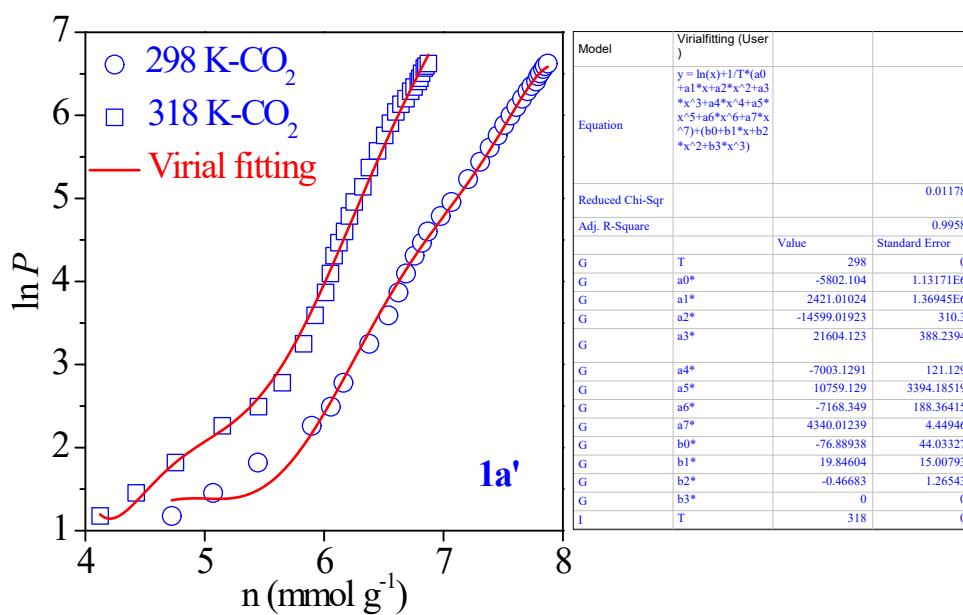

**Figure S20.** Virial fitting (lines) of the CO<sub>2</sub> adsorption isotherms over **1a'** measured at 298 and 318 K.

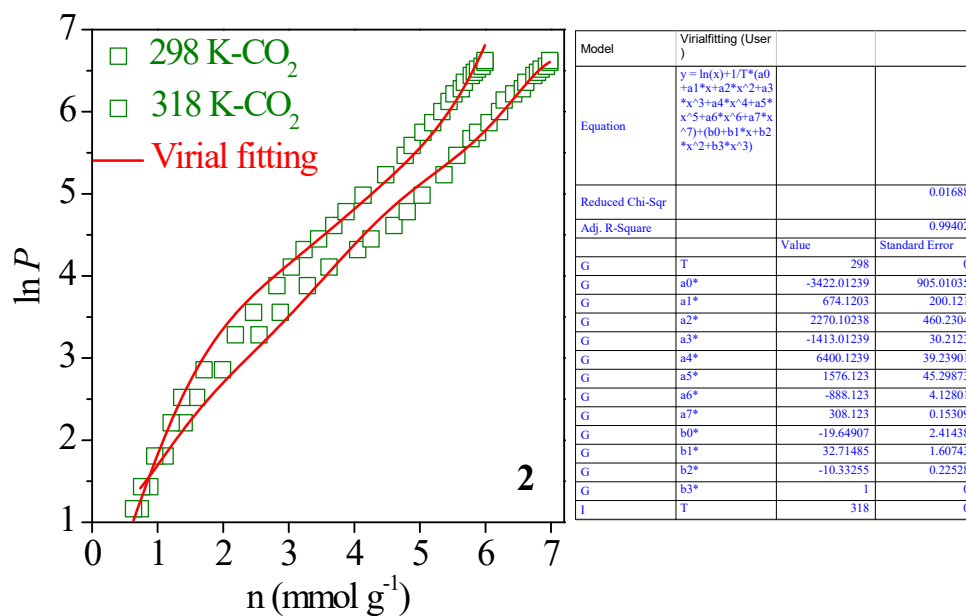

**Figure S21.** Virial fitting (lines) of the CO<sub>2</sub> adsorption isotherms over **2** measured at 298 and 318 K.

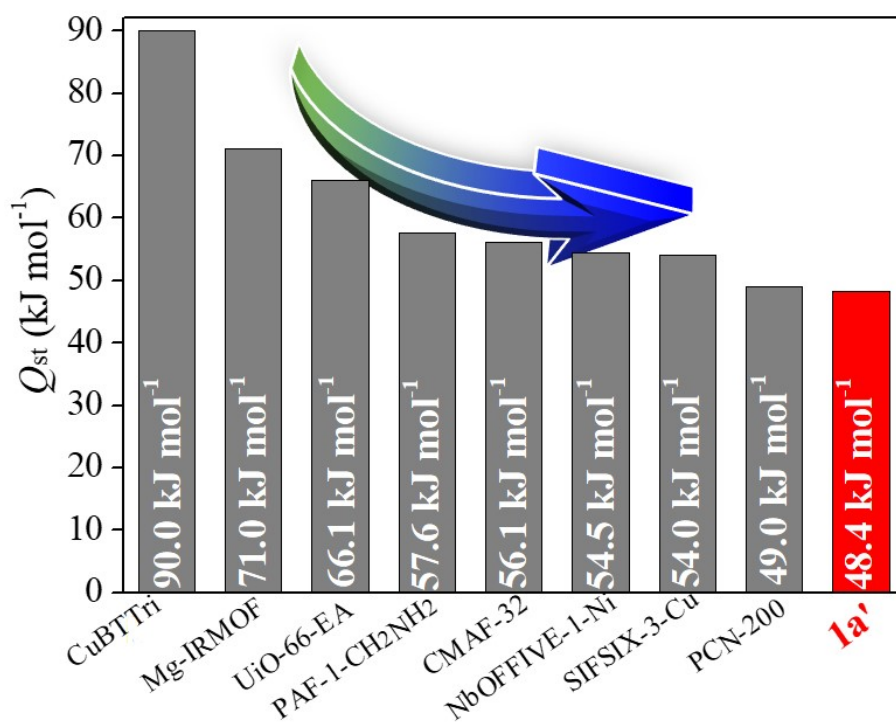

**Figure S22.** Comparison of  $Q_{st}$  over **1a'** and top-performing materials for CO<sub>2</sub> adsorption measured at similar conditions.

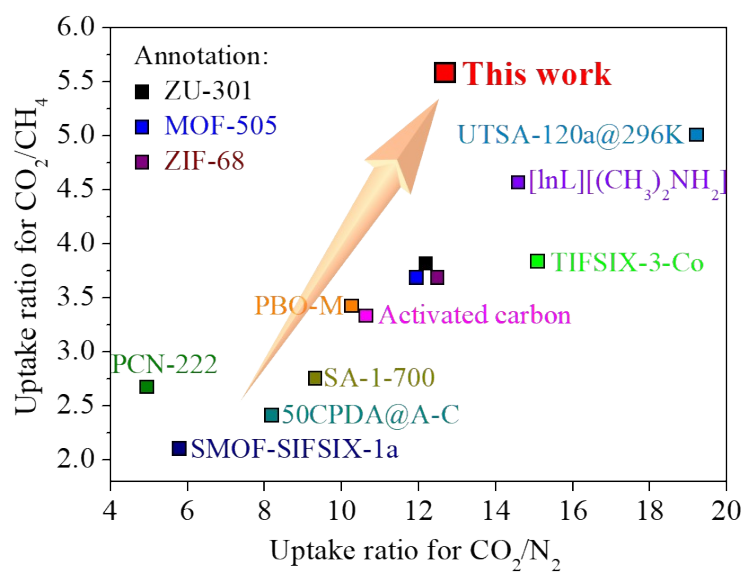

**Figure S23.** Comparison of uptake ratio CO<sub>2</sub>/N<sub>2</sub> versus CO<sub>2</sub>/CH<sub>4</sub> measured at 298 K and 1 bar. (The results were obtained from the single-gas adsorption isotherms).

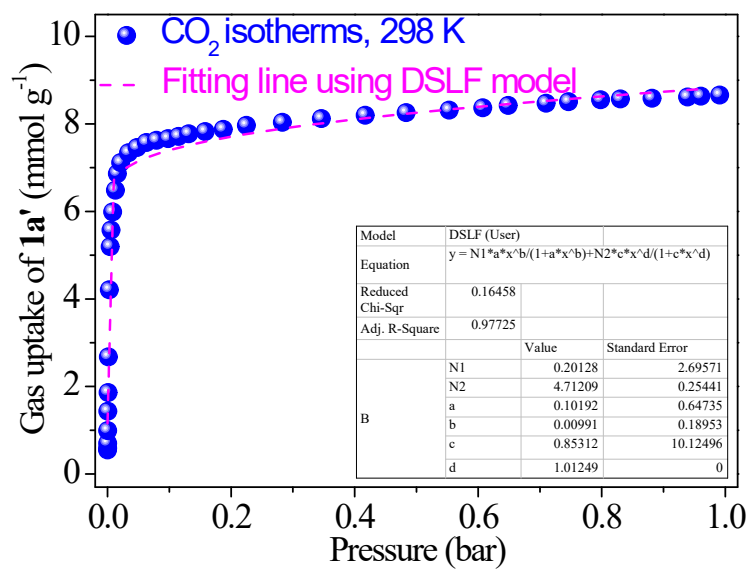

Figure S24. Isotherm fitting of CO<sub>2</sub> adsorption over **1a'** at 298 K and 1 bar.

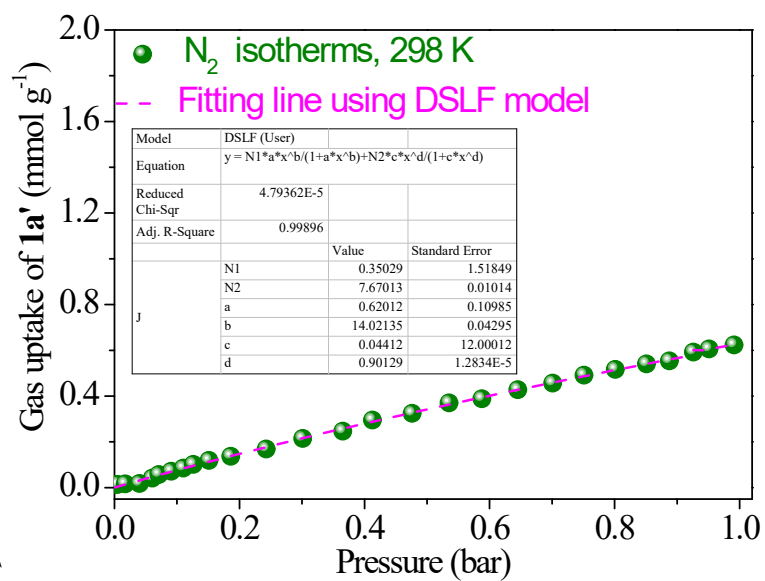

**Figure S25.** Isotherm fitting of N<sub>2</sub> adsorption over **1a'** at 298 K and 1 bar.

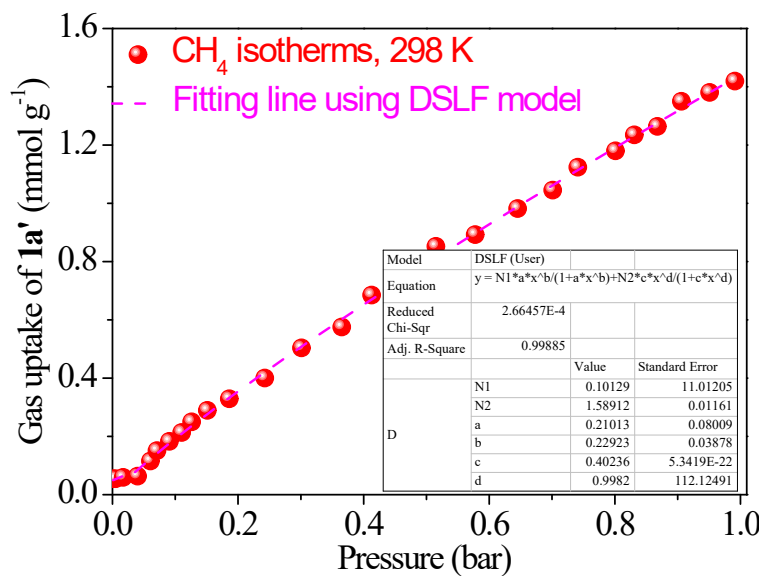

Figure S26. Isotherm fitting of CH<sub>4</sub> adsorption over **1a'** at 298 K and 1 bar.



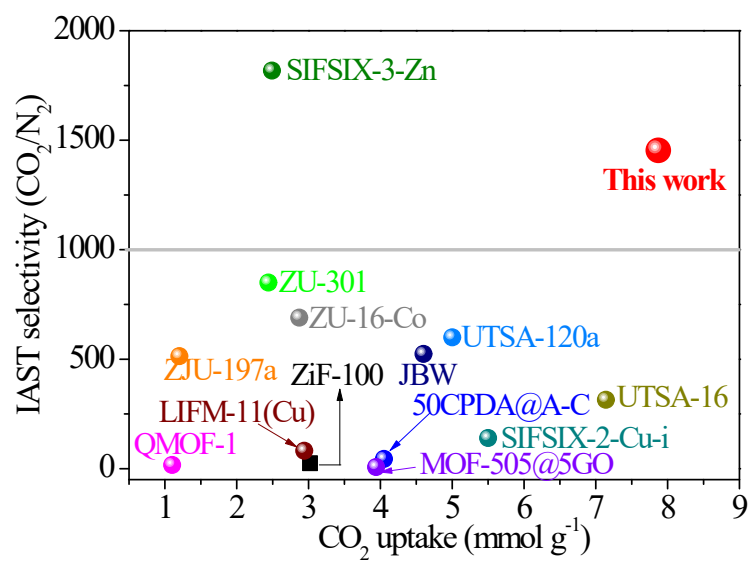

**Figure S27.** IAST selectivity of CO<sub>2</sub>/N<sub>2</sub> (15/85, v/v) versus CO<sub>2</sub> uptake over selected **1a'** and the well-known MOF materials.

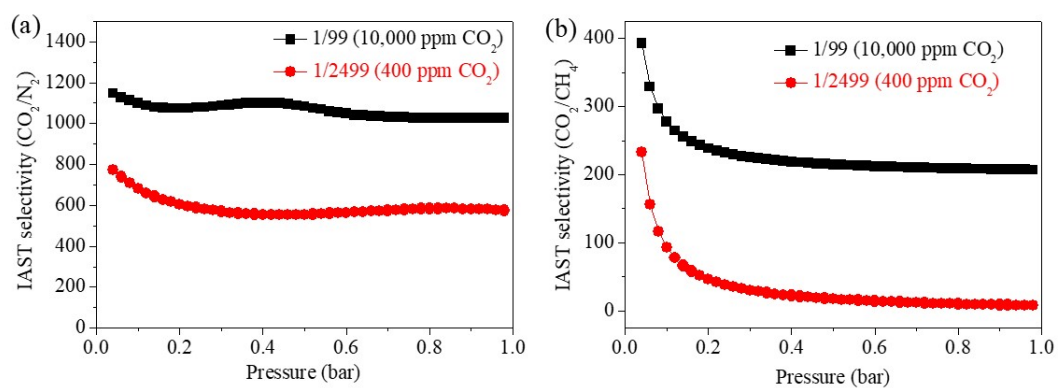

**Figure S28.** IAST calculations for 1/99 (containing 10, 000 ppm CO<sub>2</sub>) and 1/2499 (containing 400 ppm CO<sub>2</sub>) gas mixtures.

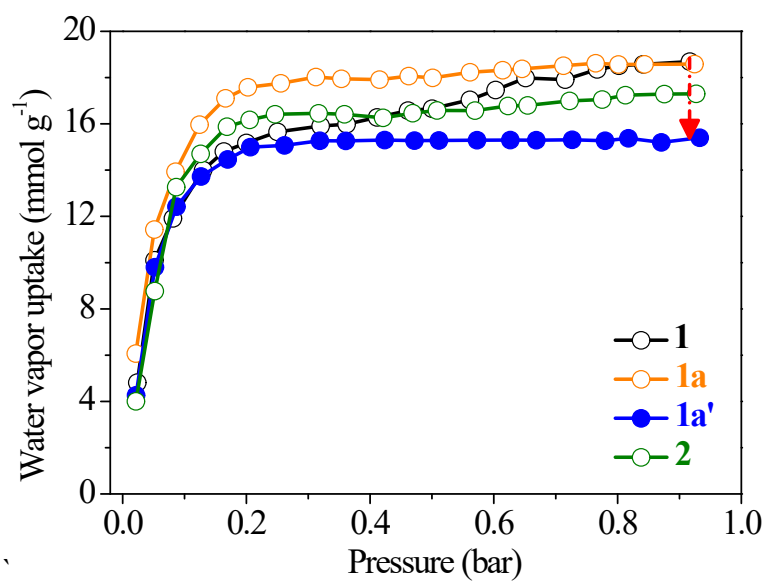

**Figure S29.** Adsorption isotherms of water vapor on the materials at 298 K and 1 bar.

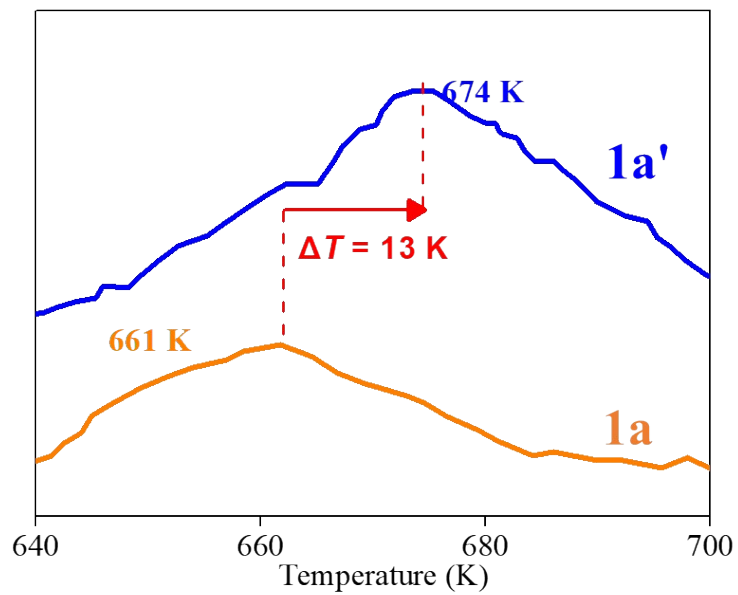

**Figure S30.** CO<sub>2</sub>-TPD profiles over selected **1a** and **1a'**.

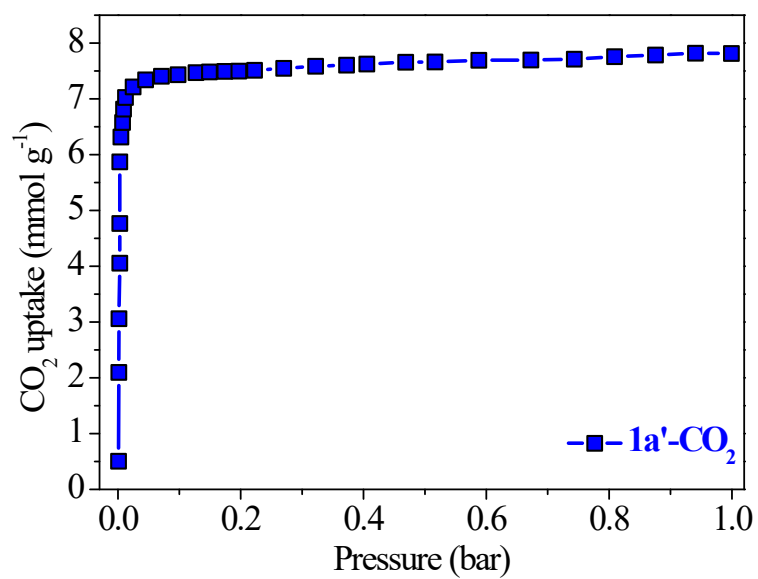

**Figure S31.** Simulated adsorption isotherms of CO<sub>2</sub> for **1a'** at 298 K and 1 bar.

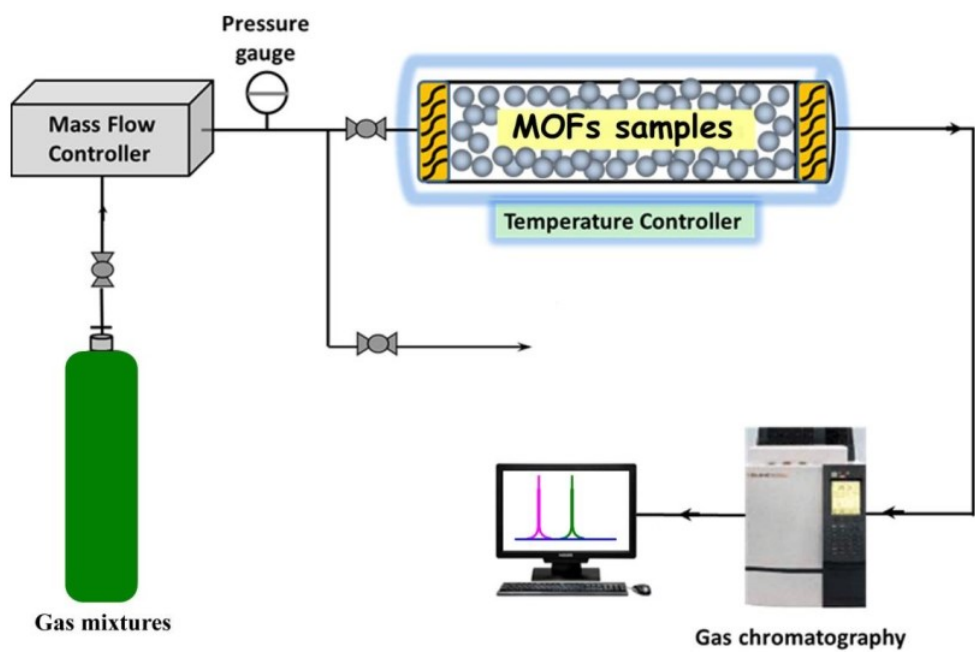

**Figure S32.** Schematic illustration of the apparatus for the breakthrough tests.

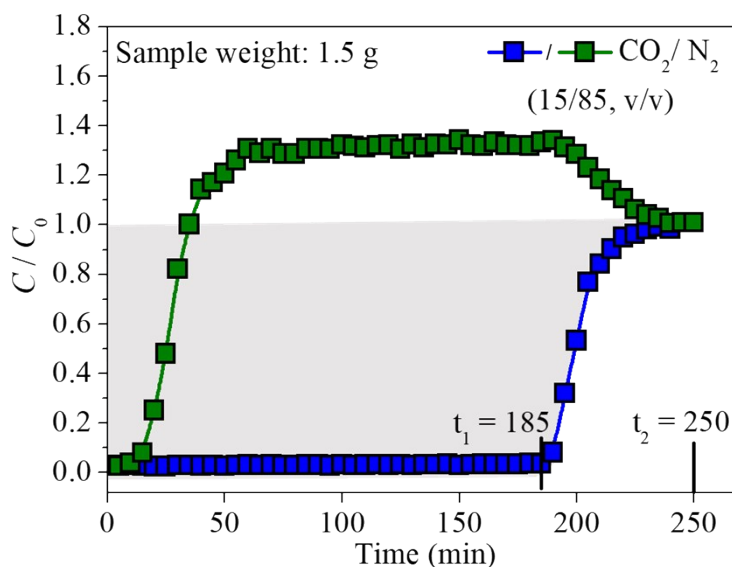

**Figure S33.** The calculation for captured amount of  $CO_2$  during the breakthrough process of  $CO_2/N_2$  (15/85, v/v) mixtures at 298 K.

(Conditions: total flow rate:  $8 \text{ mL min}^{-1}$ , temperature: 298 K, sample weight: 1.5 g)

Here, the flow rate of  $CO_2$  (15%):  $q = 1.2 \text{ mL min}^{-1} = 0.054 \text{ mmol min}^{-1}$ . During the duration before breakthrough point ( $t_0 \sim t_1$ ), the captured amount of  $CO_2$  in **1a'**,  $Q = qt = 0.054 \text{ mmol min}^{-1} \times 185 \text{ min} = 9.99 \text{ mmol}$ , corresponding to  $6.66 \text{ mmol g}^{-1}$ .

Considering the continuous  $CO_2$  adsorption during the mass transfer zone ( $t_1 \sim t_2$ ), the

max amount of  $CO_2$  during 0~250 min,  $Q_{\max} = q \int_0^{\infty} [C_i^0 - C_i(t)] dt = 10.85 \text{ mmol}$ , corresponding to  $162.0 \text{ L kg}^{-1}$  ( $7.23 \text{ mmol g}^{-1}$ ), which is about 92% of its theoretical value under the same pressure ( $7.87 \text{ mmol g}^{-1}$ ).

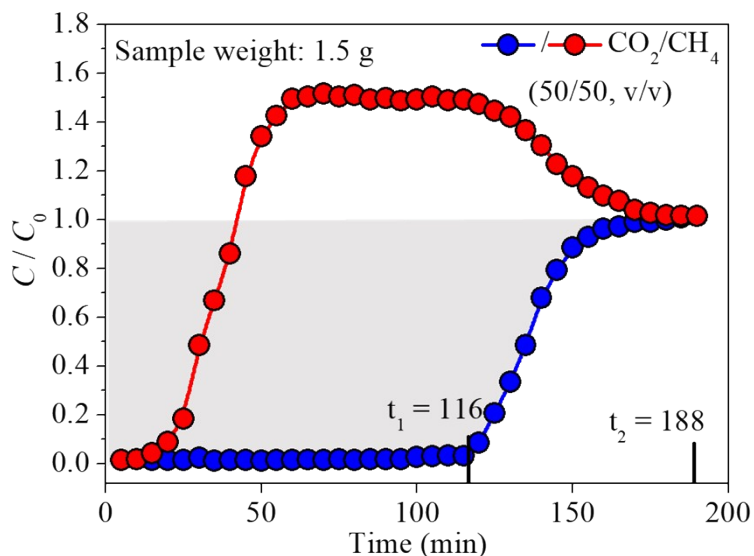

**Figure S34.** The calculation for captured amount of CO<sub>2</sub> during the breakthrough process of CO<sub>2</sub>/CH<sub>4</sub> (50/50, v/v) mixtures at 298 K.

(Conditions: total flow rate: 4 mL min<sup>-1</sup>, temperature: 298 K, sample weight: 1.5 g)

Here, the flow rate of CO<sub>2</sub> (50%):  $q = 2 \text{ mL min}^{-1} = 0.089 \text{ mmol min}^{-1}$ . During the duration before breakthrough point ( $t_0 \sim t_1$ ), the captured amount of CO<sub>2</sub> in **1a'**,  $Q = qt = 0.089 \text{ mmol min}^{-1} \times 116 \text{ min} = 10.3 \text{ mmol}$ , corresponding to  $6.87 \text{ mmol g}^{-1}$ .

Considering the continuous CO<sub>2</sub> adsorption during the mass transfer zone ( $t_1 \sim t_2$ ), the

max amount of CO<sub>2</sub> during 0~188 min,  $Q_{\max} = q \int_0^{\infty} [C_i^0 - C_i(t)] dt = 11.04 \text{ mmol}$ , corresponding to  $164.9 \text{ L kg}^{-1}$  ( $7.36 \text{ mmol g}^{-1}$ ), which is about 94% of its theoretical value under the same pressure ( $7.87 \text{ mmol g}^{-1}$ ).



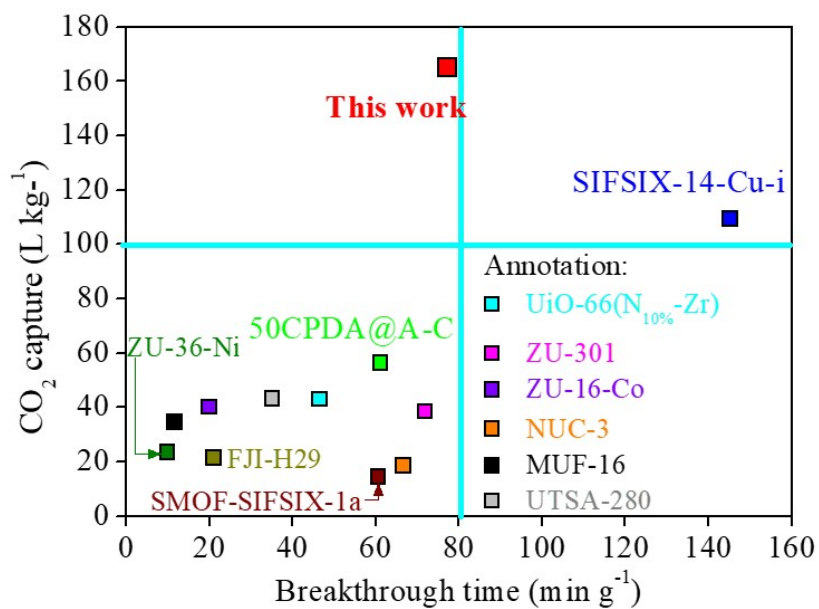

**Figure S35.** Comparison of CO<sub>2</sub> capture versus breakthrough time for CO<sub>2</sub>/CH<sub>4</sub> breakthrough tests over **1a'** and well-known benchmark materials.

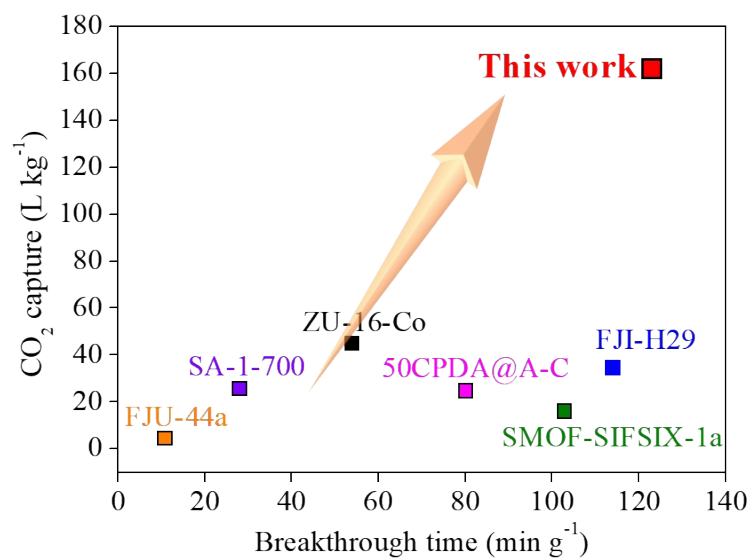

**Figure S36.** Comparison of CO<sub>2</sub> capture versus breakthrough time for CO<sub>2</sub>/N<sub>2</sub> breakthrough tests over **1a'** and well-known adsorbents.

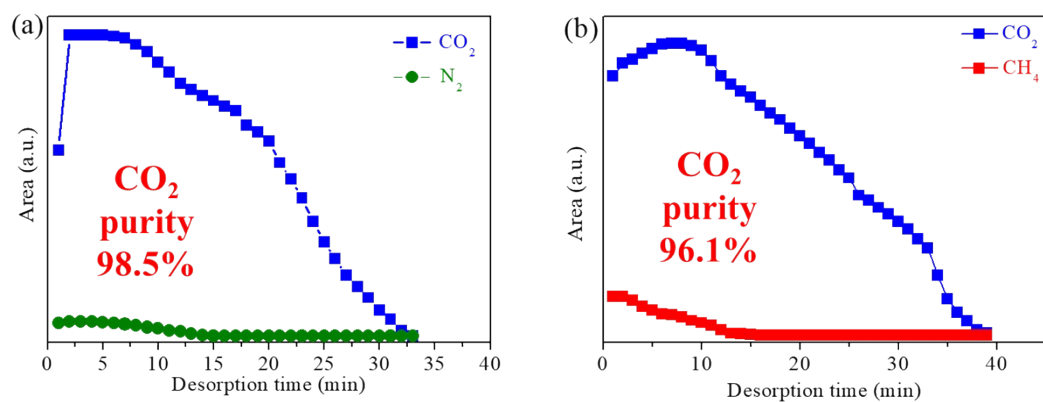

**Figure S37.** The CO<sub>2</sub> desorption curves of **1a'** for (a) CO<sub>2</sub>/N<sub>2</sub> (18/85, v/v) and (b) CO<sub>2</sub>/CH<sub>4</sub> (50/50, v/v) in breakthrough process.

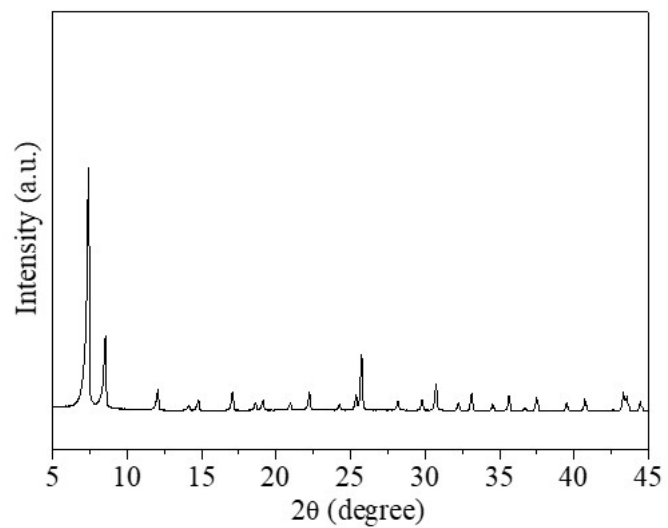

**Figure S38.** PXRD pattern of **1a'** after cycling tests.

#### 4. Supporting Tables

**Table S1.** Physical properties of CO<sub>2</sub>, N<sub>2</sub> and CH<sub>4</sub> used in this work.

| Adsorbates      | Kinetic diameter<br>(Å) | Polarizability<br>( $\times 10^{25} \text{ cm}^3$ ) | Dipole moment<br>( $\times 10^{-10} \text{ nm}$ ) | Quadrupole moment<br>( $\times 10^{-40} \text{ C}\cdot\text{m}^2$ ) |
|-----------------|-------------------------|-----------------------------------------------------|---------------------------------------------------|---------------------------------------------------------------------|
| CO <sub>2</sub> | 3.30                    | 29.1                                                | 0                                                 | -13.4±0.4                                                           |
| N <sub>2</sub>  | 3.64~3.8                | 17.4                                                | 0                                                 | -4.72±0.26                                                          |
| CH <sub>4</sub> | 3.76                    | 25.9                                                | 0                                                 | 0                                                                   |

**Table S2.** Crystallographic parameters and refinement details of selected materials.

| Crystals                                   | <b>1a</b>         | <b>1a'@25 °C</b>  | <b>1a'@75 °C</b>  | <b>1a'@125 °C</b> | <b>1a'@175 °C</b> |
|--------------------------------------------|-------------------|-------------------|-------------------|-------------------|-------------------|
| Formula weight                             | 2807.7            | 2807.3            | 2808.1            | 2807.6            | 2807.9            |
| Crystal system                             | Trigonal          | Trigonal          | Trigonal          | Trigonal          | Trigonal          |
| Space group                                | <b><i>R-3</i></b> | <b><i>R-3</i></b> | <b><i>R-3</i></b> | <b><i>R-3</i></b> | <b><i>R-3</i></b> |
| <i>a</i> (Å)                               | 25.9088           | 25.9184           | 25.9063           | 25.9026           | 25.9061           |
| <i>c</i> (Å)                               | 6.8230            | 6.8242            | 6.8208            | 6.8303            | 6.8210            |
| $\alpha$ (°)                               | 90                | 90                | 90                | 90                | 90                |
| $\beta$ (°)                                | 90                | 90                | 90                | 90                | 90                |
| $\gamma$ (°)                               | 120               | 120               | 120               | 120               | 120               |
| <i>cell volume</i> (Å <sup>3</sup> )       | 4580.0            | 4584.2            | 4577.7            | 4582.8            | 4577.8            |
| <i>Calc. density</i> (g cm <sup>-3</sup> ) | 1.168             | 1.174             | 1.172             | 1.169             | 1.172             |
| <i>R<sub>P</sub></i> (%)                   | 4.93              | 4.82              | 3.89              | 3.46              | 3.81              |
| <i>R<sub>WP</sub></i> (%)                  | 8.92              | 8.71              | 11.04             | 7.78              | 8.06              |

**Table S3.** Elemental analysis (EA) and ICP analysis of N and Co in yielding MOFs.

| MOFs       | Weight (G) | Yield (%) | Content (wt.%) |      | Amount of pyz <sup>a</sup> (mmol) | Molar ratio of N/Co       |                          |
|------------|------------|-----------|----------------|------|-----------------------------------|---------------------------|--------------------------|
|            |            |           | N              | Co   |                                   | Experimental <sup>b</sup> | Theoretical <sup>c</sup> |
| <b>1</b>   | 0.7141     | 0.73      | ---            | 12.0 | ---                               | ---                       | ---                      |
| <b>1a'</b> | 0.7514     | 0.71      | 2.50           | 10.8 | 0.67                              | 0.9738                    | 1                        |

<sup>a</sup> represent the actual amount of pyz molecule in the yielding MOFs.

<sup>b</sup> represent the calculated molar ratio of N/Co in the MOFs through experimental method.

<sup>c</sup> represent the expected molar ratio of N/Co in the MOFs given that the unit formula in MOF was

[Co<sub>2</sub>(dobdc)(pyz)].

**Table S4.** Structure data and pore parameters for these selected Co-MOF families.

(Note: all the data were measured at 195 K and 1 bar, and CO<sub>2</sub> was used as the probe molecule)

| Sample                           | $S_{BET}^a$<br>(m <sup>2</sup> g <sup>-1</sup> ) | $S_{micro}^b$<br>(m <sup>2</sup> g <sup>-1</sup> ) | $S_{micro}/S_{bet}$<br>(%) |
|----------------------------------|--------------------------------------------------|----------------------------------------------------|----------------------------|
| Simulated Co-MOF-74 <sup>e</sup> | 946                                              | ---                                                | ---                        |
| <b>1</b>                         | 625                                              | 328                                                | 52.5                       |
| <b>1a</b>                        | 825                                              | 581                                                | 70.4                       |
| <b>1a'</b>                       | 1220                                             | 1087                                               | 89.1                       |
| <b>2</b>                         | 786                                              | 509                                                | 64.8                       |

<sup>a</sup>  $S_{BET}$  is the surface area of BET calculated from CO<sub>2</sub> isotherms at 195 K.

<sup>b</sup>  $S_{micro}$  is the surface area of microporous structure.

<sup>c</sup>  $V_t$  is the total volume.

<sup>d</sup>  $V_{micro}$  is microporous volume.

<sup>e</sup> the simulated data was calculated from the optimized cell model with CO<sub>2</sub> loading.



**Table S5.** Comparison of pore size information and CO<sub>2</sub> sorption results over comparable **1a'** and benchmark materials at 298 K and variable pressure.

| Materials               | Pore size<br>Å    | CO <sub>2</sub> uptake at different pressure (mmol g <sup>-1</sup> ) |                         |             | Ref.             |
|-------------------------|-------------------|----------------------------------------------------------------------|-------------------------|-------------|------------------|
|                         |                   | 400 ppm<br>(0.4 mbar)                                                | 10,000 ppm<br>(10 mbar) | 1 bar       |                  |
| <b>1</b>                | <b>7.0</b>        | <b>0.12</b>                                                          | <b>0.91</b>             | <b>7.28</b> | <b>This work</b> |
| <b>1a</b>               | <b>7.3</b>        | <b>0.64</b>                                                          | <b>3.42</b>             | <b>6.83</b> |                  |
| <b>1a'</b>              | <b>6.1</b>        | <b>1.36</b>                                                          | <b>5.70</b>             | <b>7.87</b> |                  |
| <b>2</b>                | <b>7.8</b>        | <b>0.19</b>                                                          | <b>1.28</b>             | <b>6.98</b> |                  |
| Zu-16-Co                | 3.62              | 1.05                                                                 | 2.63                    | 2.87        | 2                |
| TIFSIX-3-Ni             | 3.40              | 0.67                                                                 | 1.75                    | 2.32        |                  |
| NbOFFIVE-1-Ni           | 3.21              | 1.30                                                                 | 1.71                    | 2.20        | 3                |
| SIFSIX-2-Cu-i           | 4.90              | 0.068                                                                | 0.19                    | 4.71        | 4                |
| SIFSIX-14-Cu-i          | 3.60              | N.G. <sup>a</sup>                                                    | 1.72                    | 4.70        | 5                |
| dptz-CuTiF <sub>6</sub> | 4.5 ~ 6.0         | N.R. <sup>b</sup>                                                    | 2.10                    | 4.51        | 6                |
| SIFSIX-3-Cu             | 3.52              | 1.24                                                                 | 2.34                    | 2.50        | 7                |
| SIFSIX-18-Ni-β          | N.R. <sup>b</sup> | 0.4 <sup>c</sup>                                                     | 2.2                     | 2.5         | 8                |
| SIFSIX-3-Ni             | N.R. <sup>b</sup> | N.R. <sup>b</sup>                                                    | N.R. <sup>b</sup>       | 2.5         | 9                |

<sup>a</sup> N.G. represent the value was negligible.

<sup>b</sup> N.R. represent the value was not reported.

**Table S6.** Summary of the adsorption capacity and uptake ratio for CO<sub>2</sub>, N<sub>2</sub> and CH<sub>4</sub> in various CO<sub>2</sub>-based sorbents at 298 K and 1 bar, respectively.

| Adsorbents                                              | Adsorption capacity<br>at 1 bar (mmol g <sup>-1</sup> ) |                   |                  | Uptake ratio at 1 bar           |                                  | Ref.             |
|---------------------------------------------------------|---------------------------------------------------------|-------------------|------------------|---------------------------------|----------------------------------|------------------|
|                                                         | CO <sub>2</sub>                                         | N <sub>2</sub>    | CH <sub>4</sub>  | CO <sub>2</sub> /N <sub>2</sub> | CO <sub>2</sub> /CH <sub>4</sub> |                  |
| <b>1a'</b>                                              | 7.87                                                    | 0.62              | 1.41             | 12.69                           | 5.58                             | <b>This work</b> |
| ZU-301                                                  | 2.44                                                    | 0.20              | 0.64             | 12.20                           | 3.81                             | 10               |
| TIFSIX-3-Co                                             | 2.87                                                    | 0.19              | 0.75             | 15.10                           | 3.83                             | 11               |
| MOF-505                                                 | 2.87                                                    | 0.24              | 0.78             | 11.96                           | 3.68                             | 12               |
| UTSA-120a                                               | 5.0 <sup>a</sup>                                        | 0.26 <sup>b</sup> | 1.0 <sup>b</sup> | 19.23                           | 5.00                             | 13               |
| Activated carbon                                        | 2.13                                                    | 0.20              | 0.64             | 10.65                           | 3.33                             | 14               |
| PBO-M                                                   | 2.67                                                    | 0.26              | 0.78             | 10.27                           | 3.42                             | 15               |
| SA-1-700                                                | 4.20                                                    | 0.45              | 1.53             | 9.33                            | 2.75                             | 16               |
| SMOF-SIFSIX-1a                                          | 1.51                                                    | 0.26              | 0.72             | 5.80                            | 2.10                             | 17               |
| ZIF-68                                                  | 2.50                                                    | 0.20              | 0.68             | 12.50                           | 3.68                             | 18               |
| [InL][(CH <sub>3</sub> ) <sub>2</sub> NH <sub>2</sub> ] | 1.46                                                    | 0.10              | 0.32             | 14.60                           | 4.56                             | 19               |
| PCN-222                                                 | 13.9                                                    | 2.80              | 5.20             | 4.96                            | 2.67                             | 20               |
| 50CPDA@A-C                                              | 4.10                                                    | 0.50              | 1.70             | 8.20                            | 2.41                             | 21               |

<sup>a</sup> referred to the value obtained from the single-gas isotherm at 296 K and 1 bar.

**Table S7.** Dual-site Langmuir -Freundlich parameters fits for CO<sub>2</sub>, N<sub>2</sub> and CH<sub>4</sub> of **1a'**.

|            | Site A               |                   |               | Site B               |                   |               |        |
|------------|----------------------|-------------------|---------------|----------------------|-------------------|---------------|--------|
|            | $N_1$                | $a$               | $b$           | $N_2$                | $c$               | $d$           |        |
|            | mol kg <sup>-1</sup> | Pa <sup>-vA</sup> | dimensionless | mol kg <sup>-1</sup> | Pa <sup>-vA</sup> | dimensionless |        |
|            | CO <sub>2</sub>      | 0.2013            | 0.1019        | 0.0099               | 4.712             | 0.8531        | 1.013  |
| <b>1a'</b> | N <sub>2</sub>       | 0.3503            | 0.6201        | 14.02                | 7.670             | 0.04412       | 0.9013 |
|            | CH <sub>4</sub>      | 0.1013            | 0.2101        | 0.2292               | 1.589             | 0.4024        | 0.9982 |

**Table S8.** Summary of the CO<sub>2</sub> adsorption, selectivities for CO<sub>2</sub>/CH<sub>4</sub> (50/50, v/v) and CO<sub>2</sub>/N<sub>2</sub> (15/85, v/v) in various porous materials.

| Adsorbents    | Conditions |            | CO <sub>2</sub> uptakes <sup>a</sup><br>(mmol g <sup>-1</sup> ) | IAST selectivity                                 |                                                 | Ref.             |
|---------------|------------|------------|-----------------------------------------------------------------|--------------------------------------------------|-------------------------------------------------|------------------|
|               | T<br>(K)   | P<br>(bar) |                                                                 | CO <sub>2</sub> /CH <sub>4</sub><br>(50/50, v/v) | CO <sub>2</sub> /N <sub>2</sub><br>(15/85, v/v) |                  |
| <b>1a'</b>    | <b>298</b> | <b>1</b>   | <b>7.87</b>                                                     | <b>494</b>                                       | <b>1454</b>                                     | <b>This work</b> |
| UTSA-120a     | 296        | 1          | 5.0                                                             | 100                                              | 600                                             | 13               |
| ZU-301        | 298        | 1          | 2.44                                                            | 111                                              | 850                                             | 10               |
| 50CPDA@A-C    | 298        | 1          | 4.05                                                            | 7.6                                              | 45.0                                            | 21               |
| ZJU-197a      | 298        | 1          | 1.2                                                             | 53                                               | 514.1                                           | 22               |
| QMOF-1        | 298        | 1          | 1.1                                                             | 6.4                                              | 17.2                                            | 23               |
| MOF-505@5GO   | 298        | 1          | 3.94                                                            | 27.8                                             | 7.6                                             | 12               |
| UTSA-16       | 298        | 1          | 7.14                                                            | 29.8                                             | 314.7                                           | 24               |
| ZU-16-Co      | 298        | 1          | 2.87                                                            | 120                                              | 690                                             | 25               |
| NKU-521       | 298        | 1          | 3.7                                                             | N.R. <sup>b</sup>                                | 40                                              | 26               |
| ZIF-100       | 273        | 1          | 3.02                                                            | 5.9                                              | 25                                              | 27               |
| LIFM-11(Cu)   | 298        | 1          | 2.94                                                            | 17.2                                             | 81.9                                            | 28               |
| SIFSIX-3-Zn   | 298        | 1          | 2.49                                                            | 231                                              | 1818                                            | 29               |
| SIFSIX-2-Cu-i | 298        | 1          | 5.50                                                            | 33                                               | 140                                             | 29               |
| JBW           | 296        | 1          | 4.60                                                            | 685.5                                            | 524.4                                           | 30               |

<sup>a</sup> referred to the value obtained from the single-gas isotherm.

<sup>b</sup> N.R. referred to the values were not reported.

**Table S9.** Comparison of determined CO<sub>2</sub> and H<sub>2</sub>O diffusion parameters for diffusivity at 298 K and 0.1 bar.

| Adsorbates       | Adsorbents | $D_M/r_c^2 (\times 10^{-3} \text{ s}^{-1})$ | $D_M (\times 10^{-15} \text{ m}^2 \text{ s}^{-1})$ |
|------------------|------------|---------------------------------------------|----------------------------------------------------|
| CO <sub>2</sub>  | <b>1a</b>  | 8.71                                        | <b>3.68</b>                                        |
|                  | <b>1a'</b> | 45.2                                        | <b>19.1</b>                                        |
| H <sub>2</sub> O | <b>1a</b>  | 4.95                                        | <b>2.09</b>                                        |
|                  | <b>1a'</b> | 2.55                                        | <b>1.08</b>                                        |

**Table S10.** Comparison of simulated CO<sub>2</sub> and H<sub>2</sub>O diffusion parameters for diffusivity.

| Adsorbates       | Adsorbents | Fitting <i>K</i> value ( $\times 10^{-7}$ ) | <i>D<sub>S</sub></i> ( $\times 10^{-15}$ m <sup>2</sup> s <sup>-1</sup> ) |
|------------------|------------|---------------------------------------------|---------------------------------------------------------------------------|
| CO <sub>2</sub>  | 1a         | 24.5                                        | 4.08                                                                      |
|                  | 1a'        | 147                                         | 24.5                                                                      |
| H <sub>2</sub> O | 1a         | 14.2                                        | 2.37                                                                      |
|                  | 1a'        | 7.35                                        | 1.23                                                                      |

**Table S11.** List of atomic positions for CO<sub>2</sub>-loaded **1a'** obtained from DFT calculations.

| Atom | x/a     | y/b     | z/c     | Atom | x/a     | y/b     | z/c     |
|------|---------|---------|---------|------|---------|---------|---------|
| C1   | 0.45655 | 0.3263  | 0.1351  | O28  | 0.34438 | 0.37387 | 0.05734 |
| C2   | 0.4368  | 0.3303  | 0.1821  | Co29 | 0.35758 | 0.34772 | 0.10292 |
| O3   | 0.4479  | 0.31735 | 0.0778  | C30  | 0.3263  | 0.36975 | 0.19823 |
| O4   | 0.48895 | 0.2928  | 0.05377 | C31  | 0.3303  | 0.3935  | 0.15123 |
| Co5  | 0.47575 | 0.31895 | 0.00819 | O32  | 0.31735 | 0.36945 | 0.25553 |
| C6   | 0.28988 | 0.49297 | 0.24621 | O33  | 0.31705 | 0.31495 | 0.06637 |
| C7   | 0.32778 | 0.43902 | 0.13654 | O34  | 0.2928  | 0.30385 | 0.27957 |
| C8   | 0.32488 | 0.41577 | 0.17504 | Co35 | 0.31895 | 0.3432  | 0.32514 |
| O9   | 0.28123 | 0.48402 | 0.18891 | C36  | 0.29692 | 0.28988 | 0.08712 |
| O10  | 0.33543 | 0.48372 | 0.04474 | C37  | 0.38877 | 0.32778 | 0.19679 |
| O11  | 0.32228 | 0.45947 | 0.16488 | C38  | 0.40912 | 0.32488 | 0.15829 |
| Co12 | 0.30908 | 0.48561 | 0.1193  | O39  | 0.29722 | 0.28123 | 0.14442 |
| C13  | 0.34037 | 0.46358 | 0.02399 | O40  | 0.35172 | 0.33543 | 0.28859 |
| C14  | 0.33637 | 0.43983 | 0.07099 | O41  | 0.36282 | 0.32228 | 0.16846 |
| O15  | 0.34932 | 0.46388 | 0.30002 | Co42 | 0.32347 | 0.30908 | 0.21403 |
| Co16 | 0.34772 | 0.49014 | 0.23042 | O43  | 0.5021  | 0.31705 | 0.26697 |
| O17  | 0.31495 | 0.4979  | 0.26697 | C44  | 0.50703 | 0.29692 | 0.24621 |
| C18  | 0.44457 | 0.33888 | 0.24766 | C45  | 0.56098 | 0.38877 | 0.13654 |
| C19  | 0.42422 | 0.34178 | 0.28616 | C46  | 0.58423 | 0.40912 | 0.17504 |
| O20  | 0.48162 | 0.33123 | 0.15586 | O47  | 0.51598 | 0.29722 | 0.18891 |
| O21  | 0.47052 | 0.34438 | 0.27599 | O48  | 0.51628 | 0.35172 | 0.04474 |
| C22  | 0.37678 | 0.34037 | 0.30934 | O49  | 0.54053 | 0.36282 | 0.16488 |
| C23  | 0.39653 | 0.33637 | 0.26234 | Co50 | 0.51439 | 0.32347 | 0.1193  |
| C24  | 0.33888 | 0.39432 | 0.08568 | C51  | 0.53642 | 0.37678 | 0.02399 |
| C25  | 0.34178 | 0.41757 | 0.04718 | C52  | 0.56017 | 0.39653 | 0.07099 |
| O26  | 0.38543 | 0.34932 | 0.03331 | O53  | 0.53612 | 0.38543 | 0.30002 |

| O27  | 0.33123 | 0.34962 | 0.17748 | Co54  | 0.50986 | 0.35758 | 0.23042 |
|------|---------|---------|---------|-------|---------|---------|---------|
| Atom | x/a     | y/b     | z/c     | Atom  | x/a     | y/b     | z/c     |
| C55  | 0.60568 | 0.44457 | 0.08568 | C82   | 0.43983 | 0.60347 | 0.26234 |
| C56  | 0.58243 | 0.42422 | 0.04718 | O83   | 0.46388 | 0.61457 | 0.03331 |
| O57  | 0.65038 | 0.48162 | 0.17748 | Co84  | 0.49014 | 0.64242 | 0.10292 |
| O58  | 0.62613 | 0.47052 | 0.05734 | C85   | 0.62322 | 0.65963 | 0.02399 |
| C59  | 0.63025 | 0.45655 | 0.19823 | C86   | 0.60347 | 0.66363 | 0.07099 |
| C60  | 0.6065  | 0.4368  | 0.15123 | C87   | 0.66112 | 0.60568 | 0.24766 |
| O61  | 0.63055 | 0.4479  | 0.25553 | C88   | 0.65822 | 0.58243 | 0.28616 |
| O62  | 0.69615 | 0.48895 | 0.27957 | O89   | 0.61457 | 0.65068 | 0.30002 |
| Co63 | 0.65681 | 0.47575 | 0.32514 | O90   | 0.66877 | 0.65038 | 0.15586 |
| C64  | 0.39432 | 0.55543 | 0.24766 | O91   | 0.65562 | 0.62613 | 0.27599 |
| C65  | 0.41757 | 0.57578 | 0.28616 | Co92  | 0.64242 | 0.65228 | 0.23042 |
| O66  | 0.34962 | 0.51838 | 0.15586 | C93   | 0.6737  | 0.63025 | 0.1351  |
| O67  | 0.37387 | 0.52948 | 0.27599 | C94   | 0.6697  | 0.6065  | 0.1821  |
| C68  | 0.36975 | 0.54345 | 0.1351  | O95   | 0.68265 | 0.63055 | 0.0778  |
| C69  | 0.3935  | 0.5632  | 0.1821  | O96   | 0.68295 | 0.68505 | 0.26697 |
| O70  | 0.36945 | 0.5521  | 0.0778  | O97   | 0.7072  | 0.69615 | 0.05377 |
| O71  | 0.30385 | 0.51105 | 0.05377 | Co98  | 0.68105 | 0.65681 | 0.00819 |
| Co72 | 0.3432  | 0.52425 | 0.00819 | C99   | 0.70308 | 0.71012 | 0.24621 |
| O73  | 0.4979  | 0.68295 | 0.06637 | C100  | 0.61123 | 0.67222 | 0.13654 |
| C74  | 0.49297 | 0.70308 | 0.08712 | C101  | 0.59088 | 0.67512 | 0.17504 |
| C75  | 0.43902 | 0.61123 | 0.19679 | O102  | 0.70278 | 0.71877 | 0.18891 |
| C76  | 0.41577 | 0.59088 | 0.15829 | O103  | 0.64828 | 0.66457 | 0.04474 |
| O77  | 0.48402 | 0.70278 | 0.14442 | O104  | 0.63718 | 0.67772 | 0.16488 |
| O78  | 0.48372 | 0.64828 | 0.28859 | Co105 | 0.67653 | 0.69092 | 0.1193  |
| O79  | 0.45947 | 0.63718 | 0.16846 | C106  | 0.54345 | 0.6737  | 0.19823 |
| Co80 | 0.48561 | 0.67653 | 0.21403 | C107  | 0.5632  | 0.6697  | 0.15123 |
| C81  | 0.46358 | 0.62322 | 0.30934 | O108  | 0.5521  | 0.68265 | 0.25553 |



| Atom  | x/a     | y/b     | z/c     | Atom  | x/a     | y/b     | z/c     |
|-------|---------|---------|---------|-------|---------|---------|---------|
| O109  | 0.51105 | 0.7072  | 0.27957 | O137  | 0.32228 | 0.45947 | 0.49821 |
| Co110 | 0.52425 | 0.68106 | 0.32514 | Co138 | 0.30908 | 0.48561 | 0.45264 |
| C111  | 0.71012 | 0.50703 | 0.08712 | C139  | 0.34037 | 0.46358 | 0.35732 |
| C112  | 0.67222 | 0.56098 | 0.19679 | C140  | 0.33637 | 0.43983 | 0.40432 |
| C113  | 0.67512 | 0.58423 | 0.15829 | O141  | 0.34932 | 0.46388 | 0.63336 |
| O114  | 0.71877 | 0.51598 | 0.14442 | Co142 | 0.34772 | 0.49014 | 0.56375 |
| O115  | 0.66457 | 0.51628 | 0.28859 | O143  | 0.31495 | 0.4979  | 0.6003  |
| O116  | 0.67772 | 0.54053 | 0.16846 | C144  | 0.44457 | 0.33888 | 0.58099 |
| Co117 | 0.69092 | 0.51439 | 0.21403 | C145  | 0.42422 | 0.34178 | 0.61949 |
| C118  | 0.65963 | 0.53642 | 0.30934 | O146  | 0.48162 | 0.33123 | 0.48919 |
| C119  | 0.66363 | 0.56017 | 0.26234 | O147  | 0.47052 | 0.34438 | 0.60932 |
| O120  | 0.65068 | 0.53612 | 0.03331 | C148  | 0.37678 | 0.34037 | 0.64268 |
| Co121 | 0.65228 | 0.50986 | 0.10292 | C149  | 0.39653 | 0.33637 | 0.59568 |
| O122  | 0.68505 | 0.5021  | 0.06637 | C150  | 0.33888 | 0.39432 | 0.41901 |
| C123  | 0.55543 | 0.66112 | 0.08568 | C151  | 0.34178 | 0.41757 | 0.38051 |
| C124  | 0.57578 | 0.65822 | 0.04718 | O152  | 0.38543 | 0.34932 | 0.36664 |
| O125  | 0.51838 | 0.66877 | 0.17748 | O153  | 0.33123 | 0.34962 | 0.51081 |
| O126  | 0.52948 | 0.65562 | 0.05734 | O154  | 0.34438 | 0.37387 | 0.39068 |
| C127  | 0.45655 | 0.3263  | 0.46843 | Co155 | 0.35758 | 0.34772 | 0.43625 |
| C128  | 0.4368  | 0.3303  | 0.51543 | C156  | 0.3263  | 0.36975 | 0.53157 |
| O129  | 0.4479  | 0.31735 | 0.41113 | C157  | 0.3303  | 0.3935  | 0.48457 |
| O130  | 0.48895 | 0.2928  | 0.3871  | O158  | 0.31735 | 0.36945 | 0.58887 |
| Co131 | 0.47575 | 0.31895 | 0.34153 | O159  | 0.31705 | 0.31495 | 0.3997  |
| C132  | 0.28988 | 0.49297 | 0.57954 | O160  | 0.2928  | 0.30385 | 0.6129  |
| C133  | 0.32778 | 0.43902 | 0.46988 | Co161 | 0.31895 | 0.3432  | 0.65847 |
| C134  | 0.32488 | 0.41577 | 0.50838 | C162  | 0.29692 | 0.28988 | 0.42046 |
| O135  | 0.28123 | 0.48402 | 0.52224 | C163  | 0.38877 | 0.32778 | 0.53012 |

| O136  | 0.33543 | 0.48372 | 0.37808 | C164  | 0.40912 | 0.32488 | 0.49162 |
|-------|---------|---------|---------|-------|---------|---------|---------|
| Atom  | x/a     | y/b     | z/c     | Atom  | x/a     | y/b     | z/c     |
| O165  | 0.29722 | 0.28123 | 0.47776 | O193  | 0.37387 | 0.52948 | 0.60932 |
| O166  | 0.35172 | 0.33543 | 0.62192 | C194  | 0.36975 | 0.54345 | 0.46843 |
| O167  | 0.36282 | 0.32228 | 0.50179 | C195  | 0.3935  | 0.5632  | 0.51543 |
| Co168 | 0.32347 | 0.30908 | 0.54736 | O196  | 0.36945 | 0.5521  | 0.41113 |
| O169  | 0.5021  | 0.31705 | 0.6003  | O197  | 0.30385 | 0.51105 | 0.3871  |
| C170  | 0.50703 | 0.29692 | 0.57954 | Co198 | 0.3432  | 0.52425 | 0.34153 |
| C171  | 0.56098 | 0.38877 | 0.46988 | O199  | 0.4979  | 0.68295 | 0.3997  |
| C172  | 0.58423 | 0.40912 | 0.50838 | C200  | 0.49297 | 0.70308 | 0.42046 |
| O173  | 0.51598 | 0.29722 | 0.52224 | C201  | 0.43902 | 0.61123 | 0.53012 |
| O174  | 0.51628 | 0.35172 | 0.37808 | C202  | 0.41577 | 0.59088 | 0.49162 |
| O175  | 0.54053 | 0.36282 | 0.49821 | O203  | 0.48402 | 0.70278 | 0.47776 |
| Co176 | 0.51439 | 0.32347 | 0.45264 | O204  | 0.48372 | 0.64828 | 0.62192 |
| C177  | 0.53642 | 0.37678 | 0.35732 | O205  | 0.45947 | 0.63718 | 0.50179 |
| C178  | 0.56017 | 0.39653 | 0.40432 | Co206 | 0.48561 | 0.67653 | 0.54736 |
| O179  | 0.53612 | 0.38543 | 0.63336 | C207  | 0.46358 | 0.62322 | 0.64268 |
| Co180 | 0.50986 | 0.35758 | 0.56375 | C208  | 0.43983 | 0.60347 | 0.59568 |
| C181  | 0.60568 | 0.44457 | 0.41901 | O209  | 0.46388 | 0.61457 | 0.36664 |
| C182  | 0.58243 | 0.42422 | 0.38051 | Co210 | 0.49014 | 0.64242 | 0.43625 |
| O183  | 0.65038 | 0.48162 | 0.51081 | C211  | 0.62322 | 0.65963 | 0.35732 |
| O184  | 0.62613 | 0.47052 | 0.39068 | C212  | 0.60347 | 0.66363 | 0.40432 |
| C185  | 0.63025 | 0.45655 | 0.53157 | C213  | 0.66112 | 0.60568 | 0.58099 |
| C186  | 0.6065  | 0.4368  | 0.48457 | C214  | 0.65822 | 0.58243 | 0.61949 |
| O187  | 0.63055 | 0.4479  | 0.58887 | O215  | 0.61457 | 0.65068 | 0.63336 |
| O188  | 0.69615 | 0.48895 | 0.6129  | O216  | 0.66877 | 0.65038 | 0.48919 |
| Co189 | 0.65681 | 0.47575 | 0.65847 | O217  | 0.65562 | 0.62613 | 0.60932 |
| C190  | 0.39432 | 0.55543 | 0.58099 | Co218 | 0.64242 | 0.65228 | 0.56375 |
| C191  | 0.41757 | 0.57578 | 0.61949 | C219  | 0.6737  | 0.63025 | 0.46843 |

| O192  | 0.34962 | 0.51838 | 0.48919 | C220 | 0.6697  | 0.6065  | 0.51543 |
|-------|---------|---------|---------|------|---------|---------|---------|
| Atom  | x/a     | y/b     | z/c     | Atom | x/a     | y/b     | z/c     |
| O221  | 0.68265 | 0.63055 | 0.41113 | C249 | 0.57578 | 0.65822 | 0.38051 |
| O222  | 0.68295 | 0.68505 | 0.6003  | O250 | 0.51838 | 0.66877 | 0.51081 |
| O223  | 0.7072  | 0.69615 | 0.3871  | O251 | 0.52948 | 0.65562 | 0.39068 |
| Co224 | 0.68105 | 0.65681 | 0.34153 | N252 | 0.39077 | 0.49921 | 0.21354 |
| C225  | 0.70308 | 0.71012 | 0.57954 | C253 | 0.39484 | 0.47529 | 0.20873 |
| C226  | 0.61123 | 0.67222 | 0.46988 | C254 | 0.4237  | 0.4799  | 0.20252 |
| C227  | 0.59088 | 0.67512 | 0.50838 | N255 | 0.44723 | 0.50821 | 0.2014  |
| O228  | 0.70278 | 0.71877 | 0.52224 | C256 | 0.44317 | 0.53213 | 0.20622 |
| O229  | 0.64828 | 0.66457 | 0.37808 | C257 | 0.41431 | 0.52753 | 0.21243 |
| O230  | 0.63718 | 0.67772 | 0.49821 | N258 | 0.38993 | 0.50396 | 0.54631 |
| Co231 | 0.67653 | 0.69092 | 0.45264 | C259 | 0.394   | 0.48004 | 0.5415  |
| C232  | 0.54345 | 0.6737  | 0.53157 | C260 | 0.42286 | 0.48465 | 0.53529 |
| C233  | 0.5632  | 0.6697  | 0.48457 | N261 | 0.4464  | 0.51296 | 0.53418 |
| O234  | 0.5521  | 0.68265 | 0.58887 | C262 | 0.44233 | 0.53688 | 0.53899 |
| O235  | 0.51105 | 0.7072  | 0.6129  | C263 | 0.41347 | 0.53228 | 0.5452  |
| C236  | 0.71012 | 0.50703 | 0.42046 | N264 | 0.55758 | 0.55888 | 0.58986 |
| C237  | 0.67222 | 0.56098 | 0.53012 | C265 | 0.58546 | 0.56265 | 0.58523 |
| C238  | 0.67512 | 0.58423 | 0.49162 | C266 | 0.61016 | 0.59138 | 0.58835 |
| O239  | 0.71877 | 0.51598 | 0.47776 | N267 | 0.60591 | 0.61508 | 0.59599 |
| O240  | 0.66457 | 0.51628 | 0.62192 | C268 | 0.57804 | 0.61131 | 0.60062 |
| O241  | 0.67772 | 0.54053 | 0.50179 | C269 | 0.55333 | 0.58259 | 0.5975  |
| Co242 | 0.69092 | 0.51439 | 0.54736 | N270 | 0.56135 | 0.5577  | 0.21113 |
| C243  | 0.65963 | 0.53642 | 0.64268 | C271 | 0.58923 | 0.56147 | 0.2065  |
| C244  | 0.66363 | 0.56017 | 0.59568 | C272 | 0.61393 | 0.5902  | 0.20963 |
| O245  | 0.65068 | 0.53612 | 0.36664 | N273 | 0.60968 | 0.6139  | 0.21726 |
| Co246 | 0.65228 | 0.50986 | 0.43625 | C274 | 0.58181 | 0.61013 | 0.2219  |
| O247  | 0.68505 | 0.5021  | 0.3997  | C275 | 0.5571  | 0.5814  | 0.21877 |

| Atom | x/a     | y/b     | z/c     | Atom | x/a     | y/b     | z/c     |
|------|---------|---------|---------|------|---------|---------|---------|
| C248 | 0.55543 | 0.66112 | 0.41901 | N276 | 0.50736 | 0.38463 | 0.57564 |
| C277 | 0.53256 | 0.4114  | 0.58459 | O288 | 0.52531 | 0.45423 | 0.42734 |
| C278 | 0.53045 | 0.43718 | 0.58998 | C289 | 0.50066 | 0.48623 | 0.43458 |
| N279 | 0.50324 | 0.43505 | 0.5862  | O290 | 0.47602 | 0.51823 | 0.44184 |
| C280 | 0.47804 | 0.40829 | 0.57726 | O291 | 0.46696 | 0.45997 | 0.22233 |
| C281 | 0.48014 | 0.38251 | 0.57187 | C292 | 0.44168 | 0.44567 | 0.17366 |
| N282 | 0.51042 | 0.38583 | 0.22175 | O293 | 0.41639 | 0.43137 | 0.125   |
| C283 | 0.53545 | 0.41315 | 0.22337 |      |         |         |         |
| C284 | 0.53298 | 0.43865 | 0.21603 |      |         |         |         |
| N285 | 0.50559 | 0.43571 | 0.20742 |      |         |         |         |
| C286 | 0.48057 | 0.40838 | 0.20581 |      |         |         |         |
| C287 | 0.48303 | 0.38289 | 0.21314 |      |         |         |         |
| O288 | 0.52531 | 0.45423 | 0.42734 |      |         |         |         |
| C289 | 0.50066 | 0.48623 | 0.43458 |      |         |         |         |
| O290 | 0.47602 | 0.51823 | 0.44184 |      |         |         |         |
| O291 | 0.46696 | 0.45997 | 0.22233 |      |         |         |         |
| C292 | 0.44168 | 0.44567 | 0.17366 |      |         |         |         |
| O293 | 0.41639 | 0.43137 | 0.125   |      |         |         |         |
| C277 | 0.53256 | 0.4114  | 0.58459 |      |         |         |         |
| C278 | 0.53045 | 0.43718 | 0.58998 |      |         |         |         |
| N279 | 0.50324 | 0.43505 | 0.5862  |      |         |         |         |
| C280 | 0.47804 | 0.40829 | 0.57726 |      |         |         |         |
| C281 | 0.48014 | 0.38251 | 0.57187 |      |         |         |         |
| N282 | 0.51042 | 0.38583 | 0.22175 |      |         |         |         |
| C283 | 0.53545 | 0.41315 | 0.22337 |      |         |         |         |
| C284 | 0.53298 | 0.43865 | 0.21603 |      |         |         |         |
| N285 | 0.50559 | 0.43571 | 0.20742 |      |         |         |         |
| C286 | 0.48057 | 0.40838 | 0.20581 |      |         |         |         |

**Table S12.** Calculated adsorption energies (in  $\text{kJ mol}^{-1}$ ) for  $\text{CO}_2$  molecule at two sites in **1a'** as determined from periodic DFT calculations. (**Site I** and **Site II** correspond to the two geometrical adsorption sites in the channel of **1a'**)

| Adsorbents | Adsorbates    | Sites | $\Delta E_{\text{B}}$<br>( $\text{kJ mol}^{-1}$ ) | Total $\Delta E_{\text{B}}$<br>( $\text{kJ mol}^{-1}$ ) | Experimental $Q_{\text{st}}$<br>( $\text{kJ mol}^{-1}$ ) |
|------------|---------------|-------|---------------------------------------------------|---------------------------------------------------------|----------------------------------------------------------|
| <b>1a'</b> | $\text{CO}_2$ | I     | <b>19.6</b>                                       | <b>47.7</b>                                             | 47.0                                                     |
|            |               | II    | <b>28.1</b>                                       |                                                         |                                                          |

**Table S13.** Breakthrough tests of CO<sub>2</sub>/CH<sub>4</sub> for **1a'** and well-known benchmark materials.

| Adsorbents     | Sample weight (g) | Flow rate (mL min <sup>-1</sup> ) | T <sup>a</sup> (K) | Feed ratio (v/v) | BT <sup>b</sup> (min g <sup>-1</sup> ) | CO <sub>2</sub> captured <sup>c</sup> |                       | Ref. <sup>d</sup> |
|----------------|-------------------|-----------------------------------|--------------------|------------------|----------------------------------------|---------------------------------------|-----------------------|-------------------|
|                |                   |                                   |                    |                  |                                        | (mmol g <sup>-1</sup> )               | (L kg <sup>-1</sup> ) |                   |
| <b>1a'</b>     | 1.5               | 4                                 | 298                | 50/50            | 77.3                                   | 7.36                                  | 164.9                 | <b>This work</b>  |
| ZU-36-Ni       | 0.63              | 4                                 | 298                | 50/50            | 10                                     | 1.04                                  | 23.3                  | 31                |
| ZU-301         | 1.092             | 1                                 | 313                | 50/50            | 72                                     | 1.71                                  | 38.3                  | 10                |
| ZU-16-Co       | 0.7               | 4                                 | 298                | 50/50            | 20                                     | 1.78                                  | 39.9                  | 2                 |
| NUC-3          | 0.48              | 2                                 | 298                | 50/50            | 66.7                                   | 0.82                                  | 18.4                  | 32                |
| SMOF-SIFSIX-1a | 0.9717            | 0.32                              | 298                | 50/50            | 60.7                                   | 0.64                                  | 14.3                  | 33                |
| FJI-H29        | 0.5232            | 2                                 | 293                | 40/60            | 21.2                                   | 0.94                                  | 21.1                  | 34                |
| MUF-16         | 0.9               | 6                                 | 298                | 50/50            | 11.8                                   | 1.53                                  | 34.3                  | 35                |
| SIFSIX-14-Cu-i | 0.238             | 1.5                               | 298                | 50/50            | 145.4                                  | 4.87                                  | 109.1                 | 36                |
| 50CPDA@A-C     | 0.212             | 2                                 | 298                | 50/50            | 61.3 <sup>d</sup>                      | 2.51                                  | 56.2                  | 37                |
| SA-1-700       | 0.8               | 2                                 | 298                | 40/60            | 15.1                                   | N.R. <sup>e</sup>                     | N.C. <sup>f</sup>     | 38                |
| MIP-202        | 1.2               | 1                                 | 298                | 50/50            | 2.0 <sup>e</sup>                       | N.R. <sup>e</sup>                     | N.C. <sup>f</sup>     | 39                |
| UTSA-120a      | 0.582             | 2                                 | 298                | 50/50            | 36                                     | N.R. <sup>e</sup>                     | N.C. <sup>f</sup>     | 40                |
| ZU-66          | 0.43              | 1.94                              | 298                | 50/50            | 65.1                                   | N.R. <sup>e</sup>                     | N.C. <sup>f</sup>     | 41                |
| PBO-M          | 0.3               | 5                                 | 273                | 50/50            | 40 <sup>d</sup>                        | N.R. <sup>e</sup>                     | N.C. <sup>f</sup>     | 42                |
| <b>Cu-1</b>    | 0.744             | 2                                 | 298                | 50/50            | 52.4                                   | N.R. <sup>e</sup>                     | N.C. <sup>f</sup>     | 43                |

<sup>a</sup> represent the temperature (T, K) in the operating breakthrough process.

<sup>b</sup> represent breakthrough time (BT, min g<sup>-1</sup>).

<sup>c</sup> represent CO<sub>2</sub> capture (mmol g<sup>-1</sup>) calculated from the breakthrough curve.

<sup>d</sup> Estimated value based on the tested breakthrough curve.

<sup>e</sup> represent not reported.

<sup>f</sup> represent not calculated.

**Table S14.** Breakthrough tests of CO<sub>2</sub>/N<sub>2</sub> for **1a'** and well-known benchmark materials.

| Adsorbents     | Sample weight<br>(g) | Flow rate<br>(mL min <sup>-1</sup> ) | T <sup>a</sup><br>(K) | Feed ratio<br>(v/v) | BT <sup>b</sup><br>(min g <sup>-1</sup> ) | CO <sub>2</sub> captured <sup>c</sup> |                       | Ref. <sup>d</sup> |
|----------------|----------------------|--------------------------------------|-----------------------|---------------------|-------------------------------------------|---------------------------------------|-----------------------|-------------------|
|                |                      |                                      |                       |                     |                                           | (mmol g <sup>-1</sup> )               | (L kg <sup>-1</sup> ) |                   |
| <b>1a'</b>     | 1.5                  | 8                                    | 298                   | 15/85               | 123                                       | 7.23                                  | 162                   | <b>This work</b>  |
| ZU-16-Co       | 0.7                  | 5                                    | 298                   | 15/85               | 54.0                                      | 1.99                                  | 44.6                  | 31                |
| SMOF-SIFSIX-1a | 0.9717               | 0.7                                  | 298                   | 15/85               | 103                                       | 0.70                                  | 15.7                  | 17                |
| FJI-H29        | 0.5232               | 2                                    | 293                   | 15/85               | 114.2                                     | 1.53                                  | 34.3                  | 32                |
| FJU-44a        | 0.5                  | 2                                    | 296                   | 15/85               | 11                                        | 0.183                                 | 4.10                  | 44                |
| 50CPDA@A-C     | 0.212                | 2                                    | 298                   | 15/85               | 80.2 <sup>d</sup>                         | 1.09                                  | 24.4                  | 37                |
| SA-1-700       | 0.8                  | 2                                    | 298                   | 15/85               | 28.1                                      | 1.14                                  | 25.5                  | 16                |
| SC-6           | 0.6                  | 1                                    | 298                   | 30/70               | 46.7                                      | N.R. <sup>e</sup>                     | N.C. <sup>f</sup>     | 45                |
| ZU-36-Ni       | 0.63                 | 4                                    | 298                   | 15/85               | 27 <sup>d</sup>                           | N.R. <sup>e</sup>                     | N.C. <sup>f</sup>     | 31                |
| ZU-301         | 1.092                | 1                                    | 313                   | 15/85               | 165                                       | N.R. <sup>e</sup>                     | N.C. <sup>f</sup>     | 10                |
| MIP-202        | 1.2                  | 1                                    | 298                   | 15/85               | 2.7 <sup>d</sup>                          | N.R. <sup>e</sup>                     | N.C. <sup>f</sup>     | 46                |
| UTSA-120a      | 0.582                | 2                                    | 298                   | 15/85               | 84                                        | N.R. <sup>e</sup>                     | N.C. <sup>f</sup>     | 40                |
| ZU-66          | 0.43                 | 2.05                                 | 298                   | 15/85               | 65 <sup>d</sup>                           | N.R. <sup>e</sup>                     | N.C. <sup>f</sup>     | 41                |
| SIFSIX-14-Cu-i | 0.238                | 1.0                                  | 273                   | 15/85               | 84 <sup>d</sup>                           | N.R. <sup>e</sup>                     | N.C. <sup>f</sup>     | 36                |
| PBO-M          | 0.3                  | 5                                    | 273                   | 15/85               | 50 <sup>d</sup>                           | N.R. <sup>e</sup>                     | N.C. <sup>f</sup>     | 47                |
| <b>Cu-1</b>    | 0.744                | 2                                    | 298                   | 10/90               | 44.3                                      | N.R. <sup>e</sup>                     | N.C. <sup>f</sup>     | 43                |

<sup>a</sup> represent the temperature (T, K) in the operating breakthrough process.

<sup>b</sup> represent breakthrough time (BT, min g<sup>-1</sup>).

<sup>c</sup> represent CO<sub>2</sub> capture (mmol g<sup>-1</sup>) calculated from the breakthrough curve.

<sup>d</sup> Estimated value based on the tested breakthrough curve.

<sup>e</sup> represent not reported.

<sup>f</sup> represent not calculated.

## References

- 1 L. Li, H. Wen, C. He, R. Lin, R. Krishna, H. Wu, W. Zhou, J. Li, B. Li and B. Chen, *Angew. Chem. Int. Edit.*, 2018, **57**, 15183-15188.
- 2 Z. Zhang, Q. Ding, J. Cui, X. Cui and H. Xing, *SCIENCE CHINA-MATERIALS*, 2021, **64**, 691-697.
- 3 P.M. Bhatt, Y. Belmabkhout, A. Cadiou, K. Adil, O. Shekhah, A. Shkurenko, L.J. Barbour and M. Eddaoudi, *J. Am. Chem. Soc.*, 2016, **138**, 9301-9307.
- 4 P. Nugent, Y. Belmabkhout, S.D. Burd, A.J. Cairns, R. Luebke, K. Forrest, T. Pham, S. Ma, B. Space, L. Wojtas, M. Eddaoudi and M.J. Zaworotko, *Nature*, 2013, **495**, 80-84.
- 5 M. Jiang, B. Li, X. Cui, Q. Yang, Z. Bao, Y. Yang, H. Wu, W. Zhou, B. Chen and H. Xing, *ACS Appl. Mater. Inter.*, 2018, **10**, 16628-16635.
- 6 W. Liang, P.M. Bhatt, A. Shkurenko, K. Adil, G. Mouchaham, H. Aggarwal, A. Mallick, A. Jamal, Y. Belmabkhout and M. Eddaoudi, *CHEM*, 2019, **5**, 950-963.
- 7 O. Shekhah, Y. Belmabkhout, Z. Chen, V. Guillermin, A. Cairns, K. Adil and M. Eddaoudi, *Nat. Commun.*, 2014, **5**.
- 8 S. Mukherjee, N. Sikdar, D. O'Nolan, D.M. Franz, V. Gascon, A. Kumar, N. Kumar, H.S. Scott, D.G. Madden, P.E. Kruger, B. Space and M.J. Zaworotko, *SCIENCE ADVANCES*, 2019, **5**.
- 9 D.G. Madden, A.B. Albadarin, D. O'Nolan, P. Cronin, J.J. Perry, S. Solomon, T. Curtin, M. Khraisheh, M.J. Zaworotko and G.M. Walker, *ACS Appl. Mater. Inter.*, 2020, **12**, 33759-33764.
- 10 C. Yu, Q. Ding, J. Hu, Q. Wang, X. Cui and H. Xing, *Chem. Eng. J.*, 2021, **405**.
- 11 Z. Zhang, Q. Ding, J. Cui, X. Cui and H. Xing, *SCIENCE CHINA-MATERIALS*, 2021, **64**, 691-697.
- 12 Y. Chen, D. Lv, J. Wu, J. Xiao, H. Xi, Q. Xia and Z. Li, *Chem. Eng. J.*, 2017, **308**, 1065-1072.
- 13 H. Wen, C. Liao, L. Li, A. Alsalmeh, Z. Allothman, R. Krishna, H. Wu, W. Zhou, J. Hu and B. Chen, *J. Mater. Chem. A*, 2019, **7**, 3128-3134.
- 14 J. Park, N.F. Attia, M. Jung, M.E. Lee, K. Lee, J. Chung and H. Oh, *Energy*, 2018, **158**, 9-16.
- 15 B. Zhang, J. Yan and Z. Wang, *J. Phys. Chem. C*, 2018, **122**, 12831-12838.
- 16 F. Yang, J. Wang, L. Liu, P. Zhang, W. Yu, Q. Deng, Z. Zeng and S. Deng, *ACS Sustain. Chem. Eng.*, 2018, **6**, 15550-15559.
- 17 J. Dai, D. Xie, Y. Liu, Z. Zhang, Y. Yang, Q. Yang, Q. Ren and Z. Bao, *Ind. Eng. Chem. Res.*, 2020, **59**, 7866-7874.
- 18 B. Liu and B. Smit, *J. Phys. Chem. C*, 2010, **114**, 8515-8522.
- 19 R. Zhong, Z. Xu, W. Bi, S. Han, X. Yu and R. Zou, *Inorg. Chim. Acta*, 2016, **443**, 299-303.
- 20 D. Lv, R. Shi, Y. Chen, Y. Chen, H. Wu, X. Zhou, H. Xi, Z. Li and Q. Xia, *Ind. Eng. Chem. Res.*, 2018, **57**, 12215-12224.
- 21 W. Liang, Z. Liu, J. Peng, X. Zhou, X. Wang and Z. Li, *Energ. Fuel.*, 2019, **33**, 493-502.
- 22 L. Zhang, K. Jiang, Y. Yang, Y. Cui, B. Chen and G. Qian, *J. Solid State Chem.*, 2017, **255**, 102-107.
- 23 R. Lin, R. Lin and B. Chen, *J. Solid State Chem.*, 2017, **252**, 138-141.
- 24 S. Xiang, Y. He, Z. Zhang, H. Wu, W. Zhou, R. Krishna and B. Chen, *Nat. Commun.*, 2012, **3**.
- 25 Z. Zhang, Q. Ding, J. Cui, X. Cui and H. Xing, *SCIENCE CHINA-MATERIALS*, 2021, **64**, 691-697.
- 26 N. Li, Z. Chang, H. Huang, R. Feng, W. He, M. Zhong, D.G. Madden, M.J. Zaworotko and X. Bu, *Small*, 2019, **15**.



- 27 B. Wang, A.P. Cote, H. Furukawa, M. O'Keeffe and O.M. Yaghi, *Nature*, 2008, **453**, 206-207.
- 28 Y. Xiong, Y. Fan, R. Yang, S. Chen, M. Pan, J. Jiang and C. Su, *Chem. Commun.*, 2014, **50**, 14631-14634.
- 29 P. Nugent, Y. Belmabkhout, S.D. Burd, A.J. Cairns, R. Luebke, K. Forrester, T. Pham, S. Ma, B. Space, L. Wojtas, M. Eddaoudi and M.J. Zaworotko, *Nature*, 2013, **495**, 80-84.
- 30 S. Xiang, Y. He, Z. Zhang, H. Wu, W. Zhou, R. Krishna and B. Chen, *Nat. Commun.*, 2012, **3**.
- 31 Z. Zhang, Q. Ding, S.B. Peh, D. Zhao, J. Cui, X. Cui and H. Xing, *Chem. Commun.*, 2020, **56**, 7726-7729.
- 32 H. Chen, L. Fan, X. Zhang and L. Ma, *ACS APPLIED NANO MATERIALS*, 2020, **3**, 2680-2686.
- 33 J. Dai, D. Xie, Y. Liu, Z. Zhang, Y. Yang, Q. Yang, Q. Ren and Z. Bao, *Ind. Eng. Chem. Res.*, 2020, **59**, 7866-7874.
- 34 D. Wu, C. Liu, J. Tian, F. Jiang, D. Yuan, Q. Chen and M. Hong, *Inorg. Chem.*, 2020, **59**, 13542-13550.
- 35 O.T. Qazvini, R. Babarao and S.G. Telfer, *Nat. Commun.*, 2021, **12**.
- 36 M. Jiang, B. Li, X. Cui, Q. Yang, Z. Bao, Y. Yang, H. Wu, W. Zhou, B. Chen and H. Xing, *ACS Appl. Mater. Inter.*, 2018, **10**, 16628-16635.
- 37 W. Liang, Z. Liu, J. Peng, X. Zhou, X. Wang and Z. Li, *Energ. Fuel.*, 2019, **33**, 493-502.
- 38 F. Yang, J. Wang, L. Liu, P. Zhang, W. Yu, Q. Deng, Z. Zeng and S. Deng, *ACS Sustain. Chem. Eng.*, 2018, **6**, 15550-15559.
- 39 D. Lv, J. Chen, K. Yang, H. Wu, Y. Chen, C. Duan, Y. Wu, J. Xiao, H. Xi, Z. Li and Q. Xia, *Chem. Eng. J.*, 2019, **375**.
- 40 H. Wen, C. Liao, L. Li, A. Alsalmeh, Z. Allothman, R. Krishna, H. Wu, W. Zhou, J. Hu and B. Chen, *J. Mater. Chem. A*, 2019, **7**, 3128-3134.
- 41 L. Yang, X. Cui, Y. Zhang, Q. Wang, Z. Zhang, X. Suo and H. Xing, *ACS Sustain. Chem. Eng.*, 2019, **7**, 3138.
- 42 B. Zhang, J. Yan and Z. Wang, *J. Phys. Chem. C*, 2018, **122**, 12831-12838.
- 43 Z.L. Ma, P.X. Liu, Z.Y. Liu, J.J. Wang, L.B. Li and L. Tian, *Inorg. Chem.*, 2021, **60**, 6550-6558.
- 44 Y. Ye, H. Zhang, L. Chen, S. Chen, Q. Lin, F. Wei, Z. Zhang and S. Xiang, *Inorg. Chem.*, 2019, **58**, 7754-7759.
- 45 S. Du, Y. Wu, X. Wang, Q. Xia, J. Xiao, X. Zhou and Z. Li, *AIChE J.*, 2020, **66**.
- 46 D. Lv, J. Chen, K. Yang, H. Wu, Y. Chen, C. Duan, Y. Wu, J. Xiao, H. Xi, Z. Li and Q. Xia, *Chem. Eng. J.*, 2019, **375**.
- 47 B. Zhang, J. Yan and Z. Wang, *J. Phys. Chem. C*, 2018, **122**, 12831-12838.
